1 **Integrated annotations and analyses of small RNA-producing loci from 47 diverse plants**

2

3 Alice Lunardon<sup>1</sup>, Nathan R. Johnson<sup>1,2</sup>, Emily Hagerott<sup>3</sup>, Tamia Phifer<sup>3</sup>, Seth Polydore<sup>1,2,4</sup>, Ceyda  
4 Coruh<sup>1,2,5</sup>, and Michael J. Axtell<sup>1,2</sup>

5

6 Corresponding author: Michael J. Axtell (mja18@psu.edu)

7

8 <sup>1</sup> Department of Biology, The Pennsylvania State University, University Park, PA 16802 USA

9 <sup>2</sup> Huck Institutes of the Life Sciences, The Pennsylvania State University, University Park, PA  
10 16802 USA

11 <sup>3</sup> Department of Biology, Knox College, Galesburg, IL 61401 USA

12 <sup>4</sup> Present address: Donald Danforth Plant Science Center, St. Louis, MO 63132 USA

13 <sup>5</sup> Present address: Salk Institute for Biological Studies, La Jolla, CA 92037 USA

14

15 **Running title**

16

17 Annotation and analysis of sRNA loci from 47 plant species

18

19 **Keywords:** small RNAs, siRNAs, microRNAs, protein-coding genes, RdDM, transposons

20

## 21 **Abstract**

22

23 Plant endogenous small RNAs (sRNAs) are important regulators of gene expression.  
24 There are two broad categories of plant sRNAs: microRNAs (miRNAs) and endogenous short  
25 interfering RNAs (siRNAs). MicroRNA loci are relatively well-annotated but comprise only a  
26 small minority of the total sRNA pool; siRNA locus annotations have lagged far behind. Here, we  
27 used a large dataset of published and newly generated sRNA sequencing data (1,333 sRNA-seq  
28 libraries containing over 20 billion reads) and a uniform bioinformatic pipeline to produce  
29 comprehensive sRNA locus annotations of 47 diverse plants, yielding over 2.7 million sRNA loci.  
30 The two most numerous classes of siRNA loci produced mainly 24 nucleotide and 21 nucleotide  
31 siRNAs, respectively. 24 nucleotide-dominated siRNA loci usually occurred in intergenic regions,  
32 especially at the 5'-flanking regions of protein-coding genes. In contrast, 21 nucleotide-  
33 dominated siRNA loci were most often derived from double-stranded RNA precursors copied  
34 from spliced mRNAs. Genic 21 nucleotide-dominated loci were especially common from disease  
35 resistance genes, including from a large number of monocots. Individual siRNA sequences of all  
36 types showed very little conservation across species, while mature miRNAs were more likely to  
37 be conserved. We developed a web server where our data and several search and analysis tools  
38 are freely accessible at <http://plantsmallrnagenes.science.psu.edu>.

39

## 40 **Introduction**

41

42 Plant regulatory small RNAs (sRNAs) play important roles in almost all biological  
43 processes. Endogenous sRNAs are 20-24 nucleotides in length and derive from longer RNA  
44 precursors that are processed by DICER-LIKE (DCL) ribonucleases. Once processed, they are  
45 loaded into Argonaute (AGO) proteins to form the RNA-induced silencing complex (RISC). Then,  
46 sRNAs guide the RISC complex to complementary sites on target RNAs, inducing either post-  
47 transcriptional or transcriptional gene silencing.

48 Endogenous sRNAs can be grouped in two broad classes based on their biogenesis and  
49 typical functions: microRNAs (miRNAs) and small interfering RNAs (siRNAs) (Axtell 2013a).  
50 MiRNAs are typically 21-22 nucleotides long, processed from single-stranded RNA (ssRNA)  
51 stem-loop precursors by DCL1, and regulate gene expression post-transcriptionally, directing  
52 mRNA degradation and translational repression (Rogers and Chen 2013). SiRNAs are processed  
53 from double-stranded RNA (dsRNA) precursors and are categorized in multiple sub-classes. The  
54 most abundant sub-class of siRNAs participates in the RNA-directed DNA methylation (RdDM)  
55 pathway, involving 24 or 21-22 nucleotide siRNAs. 24 nucleotide siRNAs are derived from  
56 Polymerase IV (Pol IV) transcripts that are converted to dsRNAs by RNA-dependent RNA  
57 polymerase 2 (RDR2) which are then processed by DCL3. They act in "canonical" RdDM,  
58 primarily targeting transposable elements (TEs) and other repeats to induce DNA methylation  
59 and reinforce transcriptional silencing. 21-22 nucleotide siRNAs are derived from Pol II  
60 transcripts and are copied by RDR6 into dsRNAs and processed by DCL2/DCL4. They act in the  
61 non-canonical RdDM pathway to establish the silencing of young TEs, both transcriptionally and  
62 post-transcriptionally (Nuthikattu et al. 2013). Another major siRNA sub-class is secondary  
63 siRNAs. Their biogenesis is triggered by a miRNA-directed cleavage of a coding or non-coding  
64 transcript. The transcript is then converted to dsRNA by RDR6 and processed by DCL proteins

65 into secondary siRNAs in a phased pattern relative to the miRNA cut site. Phased secondary  
66 siRNAs (phasiRNAs) are typically 21 or 22 nucleotides long, however a specific population of 24  
67 nucleotide phasiRNAs has been detected in anthers of many angiosperms (Xia et al. 2019). *TAS*  
68 genes are an example of loci generating non-coding RNA precursors that produce secondary  
69 siRNAs, which act *in trans* (trans-acting siRNAs, tasiRNAs) on other targets and direct their  
70 cleavage (Allen et al. 2005). Pentatricopeptide repeat (PPR) genes are the first reported  
71 protein-coding genes generating secondary siRNAs in *Arabidopsis thaliana* (Howell et al. 2007).

72 At the chromosomal level, sRNA distribution correlates with gene density, typically  
73 lower in the centromeric and pericentromeric regions and enriched in the distal euchromatic  
74 regions. This trend has been observed in maize (He et al. 2013), rice (Wei et al. 2014), tomato  
75 (The Tomato Genome Consortium 2012), hot pepper (Kim et al. 2014), upland cotton (Song et  
76 al. 2015) and sugar beet (Dohm et al. 2014). However, in a smaller number of species sRNAs  
77 mostly arise from centromeric and pericentromeric regions away from genes, as shown in *A.*  
78 *thaliana* (Kasschau et al. 2007; Ha et al. 2009), soybean (Schmitz et al. 2013), cucumber (Lai et  
79 al. 2017) and *Brachypodium distachyon* (The International Brachypodium Initiative 2010).

80 Despite differences in chromosomal distributions, the sRNA profiles near protein-coding  
81 genes are conserved amongst plant species, with 24 nucleotide siRNAs preferentially found in  
82 gene-proximal regions but depleted in gene bodies themselves. This pattern has been described  
83 in maize (Gent et al. 2013), rice (Wei et al. 2014), rapeseed (Shen et al. 2017), Chinese cabbage  
84 (Woodhouse et al. 2014), soybean (Song et al. 2013), upland cotton (Song et al. 2015) and *A.*  
85 *thaliana* (Kasschau et al. 2007; Ha et al. 2009). Depending on the species, sRNAs have opposite  
86 effects on the regulation of the proximal downstream genes. In maize, 24 nucleotide siRNAs are  
87 found with higher probability near expressed genes than non-expressed genes (Gent et al.  
88 2013; Lunardon et al. 2016). Here, siRNAs participate in RdDM to reinforce the silencing of TEs  
89 that are inserted upstream of genes, where the chromatin is accessible, therefore repressing  
90 the potentially deleterious Pol II transcription of TEs (Gent et al. 2014). In contrast, the siRNA-  
91 mediated silencing of TEs near genes is linked to lower expression of the genes in *A. thaliana*  
92 and Chinese cabbage (Hollister et al. 2011; Woodhouse et al. 2014). In addition to target TEs  
93 near genes, 24 nucleotide siRNAs can also target TEs inserted inside genes, affecting their  
94 expression (Wei et al. 2014; Lunardon et al. 2016).

95 Genome-wide analyses in barley, soybean, *Medicago truncatula* and *Physcomitrella*  
96 *patens* showed that 21 nucleotide siRNAs are not enriched in gene body regions (Hackenberg et  
97 al. 2016; Schmitz et al. 2013; Lelandais-Brière et al. 2009; Coruh et al. 2015). Nevertheless,  
98 there are many cases of well characterized genes generating 21 nucleotide phasiRNAs in dicots:  
99 nucleotide binding/leucine-rich repeat (NB-LRR) and receptor like kinase (RLK) resistance genes,  
100 PPR genes, auxin-responsive factor (ARF) genes, MYB and NAC transcription factors and F-BOX  
101 genes (Arikiti et al. 2014; Hu et al. 2015a; Xia et al. 2015b). NB-LRR genes evolve rapidly by  
102 tandem duplication and they are controlled by sRNA-mediated silencing to avoid their over-  
103 expression and prevent autoimmune responses (Yang and Huang 2014). This mechanism is  
104 conserved in a large number of dicots: soybean, *M. truncatula*, common bean, chickpea,  
105 *Populus trichocarpa*, cassava, pima cotton, potato and Norway spruce (Zhai et al. 2011; Formey  
106 et al. 2015; Srivastava et al. 2015; Klevebring et al. 2009; Xia et al. 2014; Hu et al. 2015b; Xia et  
107 al. 2015a). Amongst monocots, 21 nucleotide phasiRNAs from NB-LRR genes have been only  
108 found in barley and wheat so far (Liu et al. 2014; Zhang et al. 2019). This is consistent with the

109 fact that monocots, in contrast to dicots, produce phasiRNAs mainly from non-coding RNAs  
110 (Komiya 2017; Zheng et al. 2015).

111 The conservation of sRNAs across plants has been widely investigated for miRNAs. There  
112 are deeply conserved miRNA families together with their targets, suggesting common  
113 functional regulatory networks (Axtell and Bowman 2008). However, the majority of miRNA  
114 sequences are species-specific, indicating the presence of numerous young or still evolving  
115 miRNAs (Cuperus et al. 2011; Chávez Montes et al. 2014). Much less is known about  
116 conservation of siRNAs but a study comparing *Arabidopsis thaliana* and *Arabidopsis lyrata*  
117 suggested that individual siRNA sequences are not conserved even between closely related  
118 species (Ma et al. 2010). Moreover, while in most species analyzed so far the 24 nucleotide  
119 siRNAs are the most abundant expressed group of sRNAs, mosses, lycophytes and conifers lack  
120 a strong peak of 24 nucleotide siRNAs (Axtell and Bartel 2005; Banks et al. 2011; Dolgosheina et  
121 al. 2008).

122 There are several existing web-based resources that serve sRNA sequencing (sRNA-seq)  
123 data for multiple plants. The Cereal small RNA Database contains maize and rice genome  
124 browsers with accessible sRNA-seq data (Johnson et al. 2007). The Pln24NT website stores  
125 annotations and sequences of 24 nucleotide siRNA reads and loci for 10 species (Liu et al.  
126 2017). The Next-Gen Sequence Databases produced by the Meyers lab contain sRNA-seq and  
127 other high-throughput data with custom-built genome browsers and search functions for 27  
128 species (Nakano et al. 2006). The miRBase database (Kozomara and Griffiths-Jones 2014)  
129 provides curated, comprehensive annotations of *MIRNA* loci in a very large number of species.  
130 An equivalent database for the storage and distribution of reference annotations of siRNA-  
131 producing loci in a vast number of plant genomes does not exist (Coruh et al. 2014).

132 In this study, we used a large dataset of published and newly generated sRNA-seq data,  
133 that we processed with a consistent pipeline, to create reference sRNA loci annotations for 47  
134 plant species, including model plants and crops. We propose and use a systematic  
135 nomenclature and ontology for sRNA-producing loci that is consistent with their biology and  
136 easily traceable and updatable. We examined the genome-wide distribution of sRNA loci  
137 relative to protein-coding genes and compared it across species, providing insights into  
138 conserved sRNA functions. We organized the sRNA-seq alignment data and sRNA loci  
139 annotations in a freely available web-based database that represents an important public  
140 resource for future studies aimed to understand the biological function of sRNAs.

141

## 142 **Results**

143

### 144 **Identification and classification of sRNA loci in 47 plants**

145

146 We obtained and analyzed 48 plant genome assemblies, representing 47 different  
147 species (Table 1; two independent assemblies of *Cuscuta campestris* were analyzed). To  
148 facilitate succinct communication in figures and our database, a short code was designated for  
149 each assembly. The code begins with a three-letter prefix representing the genus and species,  
150 following the abbreviations established by miRBase (Kozomara et al. 2019). The second part of  
151 the code indicates the genome build ('-b') version in use. These genome assemblies varied  
152 widely in size, contiguity, protein-coding gene number, and repeat content (Supplemental Fig.

153 S1,S2). Most genome assemblies were from crops; others included the model plants  
 154 *Arabidopsis thaliana* and *Medicago truncatula*, the parasitic plant *Cuscuta campestris*, and  
 155 representatives of diverse lineages (*Amborella trichopoda* [basal angiosperm], *Picea abies*  
 156 [gymnosperm], *Physcomitrella patens* [bryophyte], and *Marchantia polymorpha* [bryophyte]).

157

158 **Table 1. Plants included in this study**

| Common Name      | Binomial Name                          | Code     | Group                  | Order        | Family        |
|------------------|----------------------------------------|----------|------------------------|--------------|---------------|
| Thale Cress      | <i>Arabidopsis thaliana</i>            | ath-b10  | Core Eudicots - Rosids | Brassicales  | Brassicaceae  |
| Rapeseed         | <i>Brassica napus</i>                  | bna-b1   | Core Eudicots - Rosids | Brassicales  | Brassicaceae  |
| Cabbage          | <i>Brassica oleracea var. capitata</i> | bol-b1.0 | Core Eudicots - Rosids | Brassicales  | Brassicaceae  |
| Chinese Cabbage  | <i>Brassica rapa var. pekinensis</i>   | bra-b1   | Core Eudicots - Rosids | Brassicales  | Brassicaceae  |
| Papaya           | <i>Carica papaya</i>                   | cpa-b0.4 | Core Eudicots - Rosids | Brassicales  | Caricaceae    |
| Watermelon       | <i>Citrullus lanatus</i>               | clt-b1   | Core Eudicots - Rosids | Cucurbitales | Cucurbitaceae |
| Cucumber         | <i>Cucumis sativus</i>                 | csa-b2   | Core Eudicots - Rosids | Cucurbitales | Cucurbitaceae |
| Chickpea         | <i>Cicer arietinum</i>                 | car-b2.0 | Core Eudicots - Rosids | Fabales      | Fabaceae      |
| Soybean          | <i>Glycine max</i>                     | gma-b1.0 | Core Eudicots - Rosids | Fabales      | Fabaceae      |
| Barrel Medic     | <i>Medicago truncatula</i>             | mtr-b4.0 | Core Eudicots - Rosids | Fabales      | Fabaceae      |
| Common Bean      | <i>Phaseolus vulgaris</i>              | pvu-b1.0 | Core Eudicots - Rosids | Fabales      | Fabaceae      |
| Rubber Tree      | <i>Hevea brasiliensis</i>              | hbr-b0   | Core Eudicots - Rosids | Malpighiales | Euphorbiaceae |
| Cassava          | <i>Manihot esculenta</i>               | mes-b6   | Core Eudicots - Rosids | Malpighiales | Euphorbiaceae |
| Black Cottonwood | <i>Populus trichocarpa</i>             | ptc-b3.0 | Core Eudicots - Rosids | Malpighiales | Salicaceae    |

|                        |                             |               |                                |            |                |
|------------------------|-----------------------------|---------------|--------------------------------|------------|----------------|
| Pima Cotton            | <i>Gossypium barbadense</i> | gba-b1.0      | Core<br>Eudicots -<br>Rosids   | Malvales   | Malvaceae      |
| Upland Cotton          | <i>Gossypium hirsutum</i>   | ghr-b1.1      | Core<br>Eudicots -<br>Rosids   | Malvales   | Malvaceae      |
| Cacao                  | <i>Theobroma cacao</i>      | tcc-b1.1      | Core<br>Eudicots -<br>Rosids   | Malvales   | Malvaceae      |
| Strawberry             | <i>Fragaria x ananassa</i>  | fan-b1.0      | Core<br>Eudicots -<br>Rosids   | Rosales    | Rosaceae       |
| Woodland<br>Strawberry | <i>Fragaria vesca</i>       | fve-b2.0      | Core<br>Eudicots -<br>Rosids   | Rosales    | Rosaceae       |
| Apple                  | <i>Malus x domestica</i>    | mdm-<br>b3.0  | Core<br>Eudicots -<br>Rosids   | Rosales    | Rosaceae       |
| Peach                  | <i>Prunus persica</i>       | ppe-b2.0      | Core<br>Eudicots -<br>Rosids   | Rosales    | Rosaceae       |
| Clementine             | <i>Citrus clementina</i>    | ccl-b1        | Core<br>Eudicots -<br>Rosids   | Sapindales | Rutaceae       |
| Sweet Orange           | <i>Citrus sinensis</i>      | csi-b2        | Core<br>Eudicots -<br>Rosids   | Sapindales | Rutaceae       |
| Carrot                 | <i>Daucus carota</i>        | dca-b2.0      | Core<br>Eudicots -<br>Asterids | Apiales    | Apiaceae       |
| Lettuce                | <i>Lactuca sativa</i>       | lsa-b8        | Core<br>Eudicots -<br>Asterids | Asterales  | Asteraceae     |
| Olive Tree             | <i>Olea europaea</i>        | oeu-b6        | Core<br>Eudicots -<br>Asterids | Lamiales   | Oleaceae       |
| Field Dodder           | <i>Cuscuta campestris</i>   | ccm-<br>b0.32 | Core<br>Eudicots -<br>Asterids | Solanales  | Convolvulaceae |
| Field Dodder           | <i>Cuscuta campestris</i>   | ccm-b0.1      | Core<br>Eudicots -<br>Asterids | Solanales  | Convolvulaceae |
| Pepper                 | <i>Capsicum annuum</i>      | can-b1.6      | Core<br>Eudicots -<br>Asterids | Solanales  | Solanaceae     |
| Tobacco                | <i>Nicotiana tabacum</i>    | nta-b0        | Core<br>Eudicots -<br>Asterids | Solanales  | Solanaceae     |
| Tomato                 | <i>Solanum lycopersicum</i> | sly-b2.5      | Core<br>Eudicots -<br>Asterids | Solanales  | Solanaceae     |

|                     |                                |            |                          |                |                |
|---------------------|--------------------------------|------------|--------------------------|----------------|----------------|
| Potato              | <i>Solanum tuberosum</i>       | stu-b4.04  | Core Eudicots - Asterids | Solanales      | Solanaceae     |
| Beet                | <i>Beta vulgaris</i>           | bvu-b1.2.2 | Core Eudicots            | Caryophyllales | Amaranthaceae  |
| Quinoa              | <i>Chenopodium quinoa</i>      | cqi-b1.0   | Core Eudicots            | Caryophyllales | Amaranthaceae  |
| Spinach             | <i>Spinacia oleracea</i>       | sol-b1     | Core Eudicots            | Caryophyllales | Amaranthaceae  |
| African Oil Palm    | <i>Elaeis guineensis</i>       | egu-b5.1   | Monocots                 | Arecales       | Arecaceae      |
| Stiff brome         | <i>Brachypodium distachyon</i> | bdi-b1.0   | Monocots                 | Poales         | Poaceae        |
| Barley              | <i>Hordeum vulgare</i>         | hvu-b1     | Monocots                 | Poales         | Poaceae        |
| Rice                | <i>Oryza sativa</i>            | osa-b1.0   | Monocots                 | Poales         | Poaceae        |
| Sorghum             | <i>Sorghum bicolor</i>         | sbi-b3.0   | Monocots                 | Poales         | Poaceae        |
| Foxtail Millet      | <i>Setaria italica</i>         | sit-b2     | Monocots                 | Poales         | Poaceae        |
| Wheat               | <i>Triticum aestivum</i>       | tae-b1     | Monocots                 | Poales         | Poaceae        |
| Maize               | <i>Zea mays</i>                | zma-b4     | Monocots                 | Poales         | Poaceae        |
| Banana              | <i>Musa acuminata</i>          | mac-b2     | Monocots                 | Zingiberales   | Musaceae       |
| Amborella           | <i>Amborella trichopoda</i>    | atr-b1     | Basal Angiosperms        | Amborellales   | Amborellaceae  |
| Norway Spruce       | <i>Picea abies</i>             | pab-b1.0c  | Gymnosperms              | Pinales        | Pinaceae       |
| Spreading Earthmoss | <i>Physcomitrella patens</i>   | ppt-b3.0   | Bryophytes               | Funariales     | Funariaceae    |
| Common Liverwort    | <i>Marchantia polymorpha</i>   | mpo-b3.0   | Bryophytes               | Marchantiales  | Marchantiaceae |

159  
 160 We gathered sRNA-seq libraries from each genome (Figure 1A). In most cases, these  
 161 data were from public sequencing archives (Supplemental Table S1). In a few cases, we also  
 162 generated novel sRNA-seq libraries (*Zea mays*, *Spinacia oleracea*, *Daucus carota*, *Theobroma*  
 163 *cacao*; Supplemental Table S1). We sought to annotate the full diversity of sRNA loci and thus  
 164 selected libraries with the goal of including as many different tissues and conditions as possible.  
 165 However, we excluded low-depth sRNA-seq datasets (less than two million reads aligned to the  
 166 genome) and also excluded sRNA-seq datasets from mutants known to affect sRNA biogenesis  
 167 or stability. For each given genome assembly, all cognate sRNA-seq libraries were aligned and  
 168 then merged into a single master sRNA alignment which we call the "reference set" (Figure 1A).  
 169 Reference sets had considerable variation in both total number of sRNA reads (minimum:  
 170 2.1E6, median: 1.6E8, maximum: 4.1E9) and in number of contributing sRNA-seq libraries  
 171 (minimum: 1, median: 11, maximum: 161)(Supplemental Fig. S3).

172 For annotation, we first identified genomic regions producing sRNAs, independently in  
 173 all sRNA-seq libraries with ShortStack (Axtell 2013b; Johnson et al. 2016). Then we compared  
 174 the sRNA expression from different samples of the same species and identified the regions that  
 175 were robustly expressing sRNAs in at least three separate samples. Millions of discrete sRNA  
 176 clusters were annotated in this way and defined as sRNA-producing loci, which were then

177 analyzed in the genome-aligned reference sets. Canonical plant miRNAs and siRNAs are  
178 between 20 and 24 nucleotides in length, while other types of sRNA loci produce a broader  
179 range of RNA sizes. For each locus, we computed the fraction of aligned sRNA-seq reads that  
180 were 20-24 nucleotides long. We found that these fractions had consistent bimodal  
181 distributions in the various genomes (Figure 1B). Based on these distributions, we used a cutoff  
182 of 80% to discriminate canonical siRNA/*MIRNA* loci from 'OtherRNA' loci (Figure 1C). We then  
183 developed a simplified ontology to describe the siRNA and *MIRNA* loci: 'MIRNA' loci were those  
184 that met all *MIRNA* annotation criteria, while 'nearMIRNA' loci met most criteria except for that  
185 the exact predicted miRNA\*, the complementary strand to the mature miRNA in the miRNA-  
186 miRNA\* duplex, was not sequenced. The remaining loci were classified as siRNA loci based on  
187 the predominant length of aligned sRNAs within each locus (Figure 1C). This ontology has the  
188 advantage of being applicable to any genome regardless of any other annotations or  
189 information. We also devised a simple nomenclature to systematically name the sRNA loci  
190 (Figure 1D). In total, we annotated approximately 2.7E6 sRNA-producing loci from the 48  
191 genome assemblies (Supplemental Table S2; also see  
192 <http://plantsmallrnagenes.science.psu.edu> for easier access and more analysis options).

193 The 'OtherRNA' category of loci, defined by having less than 80% of aligned reads with  
194 sizes between 20-24 nucleotides in length, typically comprised less than half of all loci in the  
195 flowering plants (Supplemental Fig. S4A,B). In contrast, the majority of loci identified in one  
196 gymnosperm and two bryophyte genomes were annotated as OtherRNA (Supplemental Fig.  
197 S4A,B). Across all taxa, OtherRNA loci typically contributed large fractions of total read  
198 abundance (Supplemental Fig. S4C,D). This is because many of the OtherRNA loci represented  
199 clusters of short fragments derived from highly abundant, longer RNAs, such as rRNAs, tRNAs,  
200 and plastid-derived mRNAs. There is evidence that some plant RNAs longer than 24 nucleotides,  
201 or shorter than 20 nucleotides, may function as gene-regulatory factors (Martinez et al. 2017);  
202 such loci will have been annotated in the OtherRNA category by our procedure. Nonetheless,  
203 we focused our subsequent analyses on the MIRNA, nearMIRNA, and siRNA loci dominated by  
204 20-24 nucleotide RNAs because these sizes are most clearly associated with production by DCL  
205 endonucleases and usage by AGO proteins. By default, ShortStack assigns a phasing score to the  
206 sRNA loci based on the algorithm described in Guo et al. 2015. However, an accurate  
207 annotation of the phasing would require a more complex study to avoid false positives that may  
208 be produced by the commonly used phasing-detecting algorithms (Polydore et al. 2018).  
209 Therefore, we did not further analyze the phasing of the sRNA loci in this analysis.

210 After excluding OtherRNA loci, the remaining loci were mostly designated siRNA24 in  
211 angiosperms (Figure 1E-F). In contrast, and consistent with prior reports (Dolgosheina et al.  
212 2008; Axtell and Bartel 2005), gymnosperm and bryophyte loci were less dominated by the  
213 siRNA24 type and instead had more siRNA21 loci. When tallied by sRNA abundance, MIRNA and  
214 siRNA21 loci made substantial contributions in all taxa (Figure 1G-H). This indicates that a  
215 relatively small number of MIRNA and siRNA21 loci produce high levels of their respective  
216 sRNAs. In a number of species, the proportion of 22 nucleotide siRNAs was also substantial and  
217 this trend was particularly consistent amongst the asterids (Figure 1H). In most cases,  
218 angiosperms had more annotated sRNA loci compared to non-angiosperms (Supplemental Fig.  
219 S4A, Figure 1E). However, that comparison is potentially complicated by the different amounts  
220 of input sRNA reads used for each species (Supplemental Fig. S3).



221

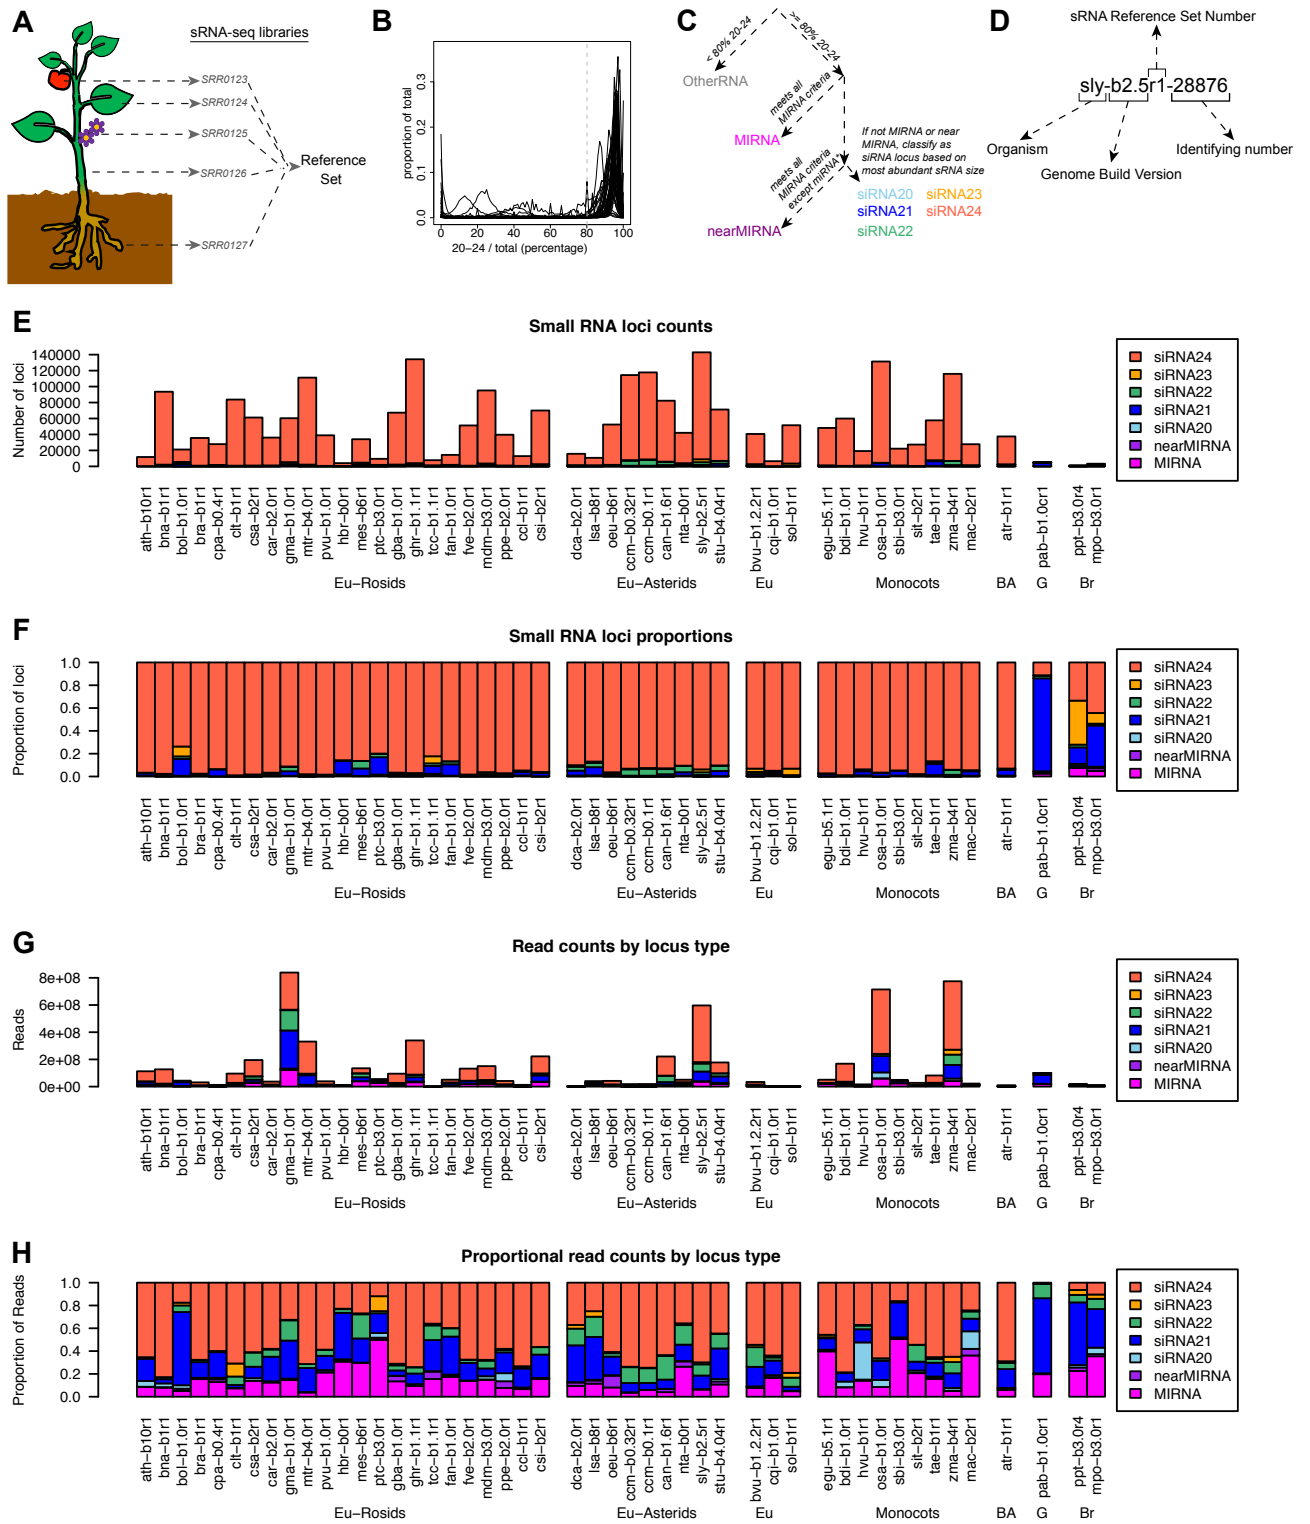

222  
223

224 **Figure 1.** Overview of sRNA locus annotation pipeline and summary of annotated sRNA loci. **(A)**  
225 Schematic illustrating how multiple sRNA libraries from diverse plant tissues are merged to  
226 create a 'reference set' of sRNAs for a given species. Accession numbers shown are fictional. **(B)**  
227 Distributions of the fractions of sRNAs between 20-24 nucleotides in length (inclusive) within all  
228 loci in each genome. Gray line at 80% represents the cutoff used to discriminate silencing-  
229 related RNA loci from other types of sRNA-producing loci. **(C)** Flowchart illustrating the ontology  
230 used to classify sRNA-producing loci. Colors designating different locus types are used  
231 throughout this work. **(D)** Schematic illustrating the nomenclature used to annotate sRNA-  
232 producing loci. **(E-H)** Summary of annotated sRNA loci, by species and locus type, excluding the  
233 category 'OtherRNA' **(E)** Counts of annotated loci. **(F)** Proportions of annotated loci. **(G)** Total  
234 counts of aligned small RNAs in reference sets. **(H)** Proportions of small RNA total read counts  
235 in reference sets. See Table 1 for species codes. Eu: eudicots, BA: basal angiosperm, G:  
236 gymnosperm, Br: bryophyte.

237

### 238 **The [plantsmallrnagenes.science.psu.edu](https://plantsmallrnagenes.science.psu.edu) server**

239

240 All data and analyses from this study have been systematically organized and are freely  
241 available at <https://plantsmallrnagenes.science.psu.edu>. Users can search for loci of interest by  
242 sRNA sequence, *MIRNA* family name, locus name, or by BLAST-based homology searches. A  
243 JBrowse-based genome browser is available for each of the 48 genomes. Genome browsers are  
244 customized to display sRNA-seq data based on sRNA size, strand, and multi-mapping (Figure  
245 2A). Genome browsers also allow users to highlight a region of interest and perform on the fly  
246 analyses, including ShortStack (Axtell 2013b; Johnson et al. 2016) and visualization of possible  
247 *MIRNA* hairpins (Figure 2B). Bulk data are also available in standard, widely used formats: sRNA-  
248 seq alignments are in the BAM format, while annotations of sRNA loci are in the GFF3 format. It  
249 is our intention to maintain and expand this resource for the benefit of anyone interested in the  
250 analysis of plant sRNA-producing loci.

251

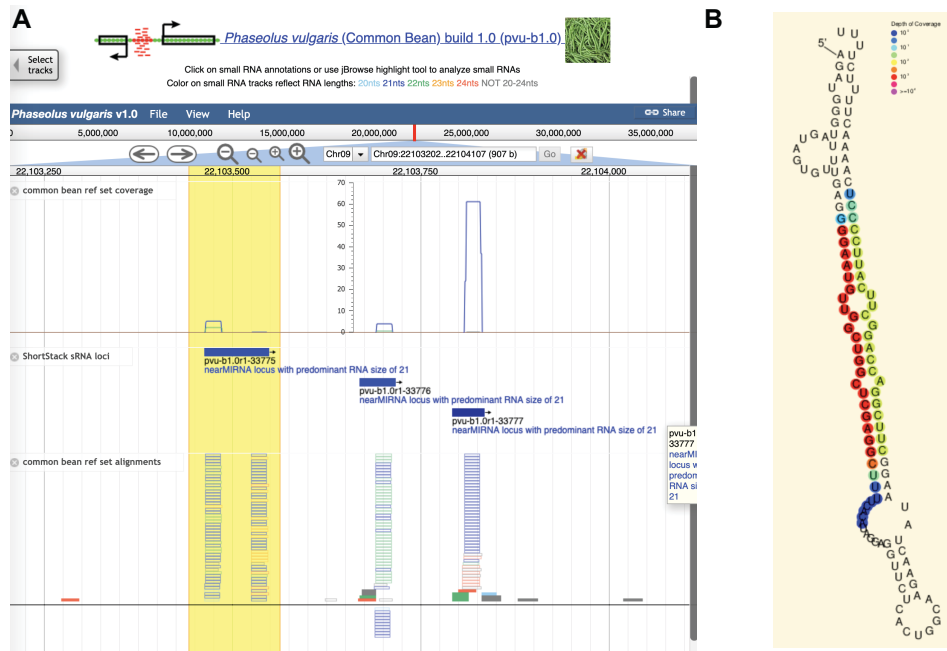

252  
253  
254 **Figure 2.** Example screenshots from <https://plantsmallrnagenes.science.psu.edu> (A) Screenshot  
255 of genome browser for a region of *Phaseolus vulgaris* chromosome 9. Coverage track shows  
256 sRNA-seq alignment depths from the reference set, separated by sRNA lengths (indicated by  
257 colors). ShortStack sRNA loci track shows sRNA locus annotations. Alignments track shows  
258 individual sRNA reads from the reference set, with lengths indicated by colors. Hollow bars  
259 indicate multi-mapped reads; solid bars are uniquely mapped reads. A user-highlighted region  
260 is indicated in yellow. (B) Analysis of predicted RNA secondary structure with sRNA-alignment  
261 depths indicated by colors. This analysis is one of several that can be triggered by user selection  
262 of a region of interest (yellow region in panel A).

## 263 264 **Chromosomal distribution of sRNA loci and association with protein-coding genes**

265  
266 Where feasible based on genome assembly quality, we compared the distribution of  
267 sRNA loci and genes across entire chromosomes and confirmed that the most common trend is  
268 a positive correlation between gene density and sRNA density (Supplemental Fig. S5), as has  
269 previously been shown in several prior species-specific studies (He et al. 2013; Wei et al. 2014;  
270 The Tomato Genome Consortium 2012; Kim et al. 2014; Song et al. 2015; Dohm et al. 2014). *A.*  
271 *thaliana* is unique in that it has a clear trend from telomeres to centromeres of decreasing gene  
272 density and increasing sRNA loci density (Kasschau et al. 2007; Ha et al. 2009). Surprisingly, rice  
273 showed a similar trend to *A. thaliana* (Supplemental Fig. S5). Chinese cabbage and sweet  
274 orange also showed a slight inverse correlation between the gene and the sRNA loci  
275 distributions. Finally, soybean had a general positive correlation between genes and sRNA loci  
276 but in the most distal segments of the chromosome arms it showed a local negative correlation  
277 (Supplemental Fig. S5).

278 We examined siRNA21 loci and siRNA24 loci locations relative to protein-coding genes.  
279 Other types of sRNA loci were excluded due to their lower frequencies. Coverage of protein-

280 coding genes and flanking 5kb regions by siRNA21 or siRNA24 loci was calculated and  
 281 normalized. siRNA21 loci had a striking tendency in nearly all taxa to overlap with protein-  
 282 coding genes (Figure 3A). In contrast, siRNA24 loci were strongly depleted in protein-coding  
 283 genes in most angiosperms (Figure 3B). siRNA24 loci were often strongly enriched in the 5'-  
 284 proximal regions upstream of protein-coding genes. There were, however, some notable  
 285 exceptions to this pattern. There was no upstream peak of siRNA24 loci in bryophytes and the  
 286 gymnosperm (Figure 3B), which is consistent with the generally low levels of siRNA24 loci in  
 287 these taxa (Figure 1). The basal angiosperm *Amborella trichopoda* was unusual in that siRNA24  
 288 loci were not depleted in gene bodies at all (Figure 3B). Finally, the model plant *A. thaliana* also  
 289 lacked a conspicuous upstream gene-proximal enrichment of siRNA24 loci. This observation,  
 290 together with the unique chromosomal distribution of sRNA loci in *A. thaliana*, suggests that *A.*  
 291 *thaliana* may not be representative of most angiosperms in its genome-wide patterns of sRNA  
 292 loci.

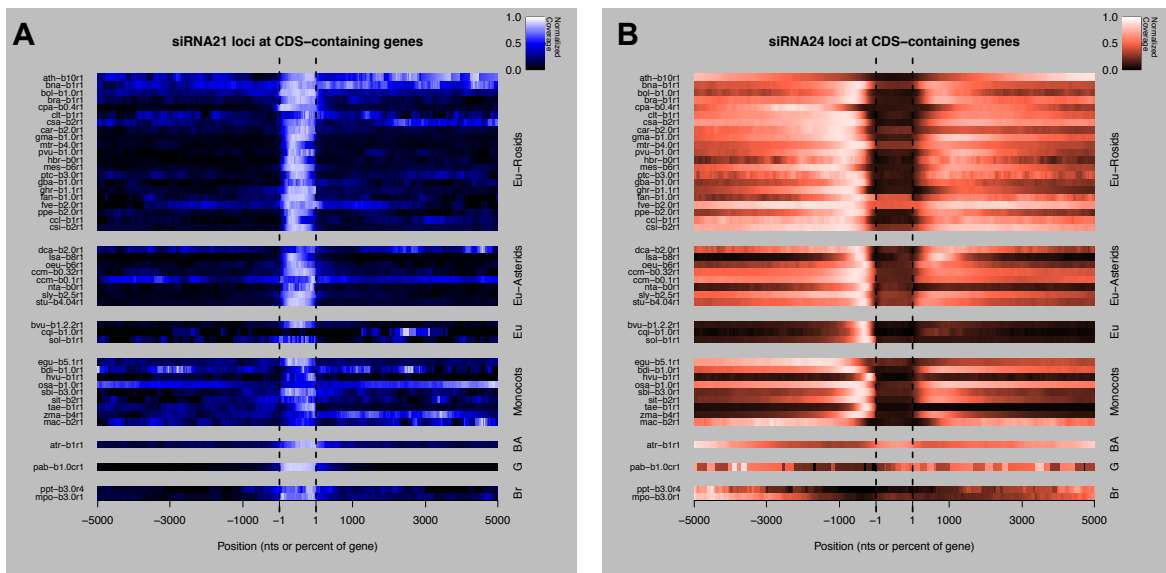

293  
 294  
 295 **Figure 3.** Associations of siRNA21 loci and siRNA24 loci with protein-coding genes. **(A)** Heatmap  
 296 showing normalized coverage of protein-coding genes +/- 5kb by siRNA21 loci. Each row is a  
 297 given species (See Table 1 for species codes), grouped taxonomically. Eu: eudicots, BA: basal  
 298 angiosperm, G: gymnosperm, Br: bryophyte. Negative and positive numbers are upstream and  
 299 downstream regions, respectively (in nucleotides). The region from -1 to +1 represents the gene  
 300 bodies, scaled to a uniform size of 1,000 nominal units of 0.1% each. **(B)** As in A, except for  
 301 siRNA24 loci.

302  
 303 **Distribution of sRNAs in exons and introns of protein-coding genes**

304  
 305 We then analyzed the distribution of sRNAs mapped to protein-coding genes, relative to  
 306 the mRNA exons/introns and relative to the coding/non-coding strand of the mRNA (Figure 4).  
 307 Although siRNA24 loci were generally depleted in mRNAs (Figure 3), their very large numbers  
 308 still resulted in many overlaps, and therefore they were included in this analysis (Supplemental

309 Fig. S6). For each species, we calculated the proportion of mRNAs that have 0% to 100% sRNAs  
310 mapped to the exons and the proportion of mRNAs that have 0% to 100% sRNAs mapped to the  
311 same strand of the mRNA. The proportions were plotted separately for mRNAs containing  
312 siRNA21 and siRNA24 loci. mRNAs containing siRNA21 loci showed a strong association with  
313 sRNAs arising from exons in the vast majority of the species (Figure 4A). These exonic 21  
314 nucleotide siRNAs are most likely secondary siRNAs derived from the processing of the mRNAs.  
315 In contrast, in the mRNAs containing siRNA24 loci, sRNAs were primarily generated from  
316 introns in nearly all species (Figure 4B). Because 24 nucleotide siRNAs are known to be enriched  
317 in TEs, these intronic 24 nucleotide siRNAs could often be generated from intronic TE  
318 insertions. Some species showed a lesser association of siRNA24 loci with introns: this may be  
319 caused by differences in the annotation of TEs, which can sometimes be erroneously annotated  
320 as mRNAs. The siRNAs at both siRNA21 and siRNA24 loci typically originated from both strands  
321 of their associated genes (Figure 4C-D). This trend is consistent with processing from dsRNA  
322 precursors, as opposed to breakdown products from the mRNAs themselves.  
323

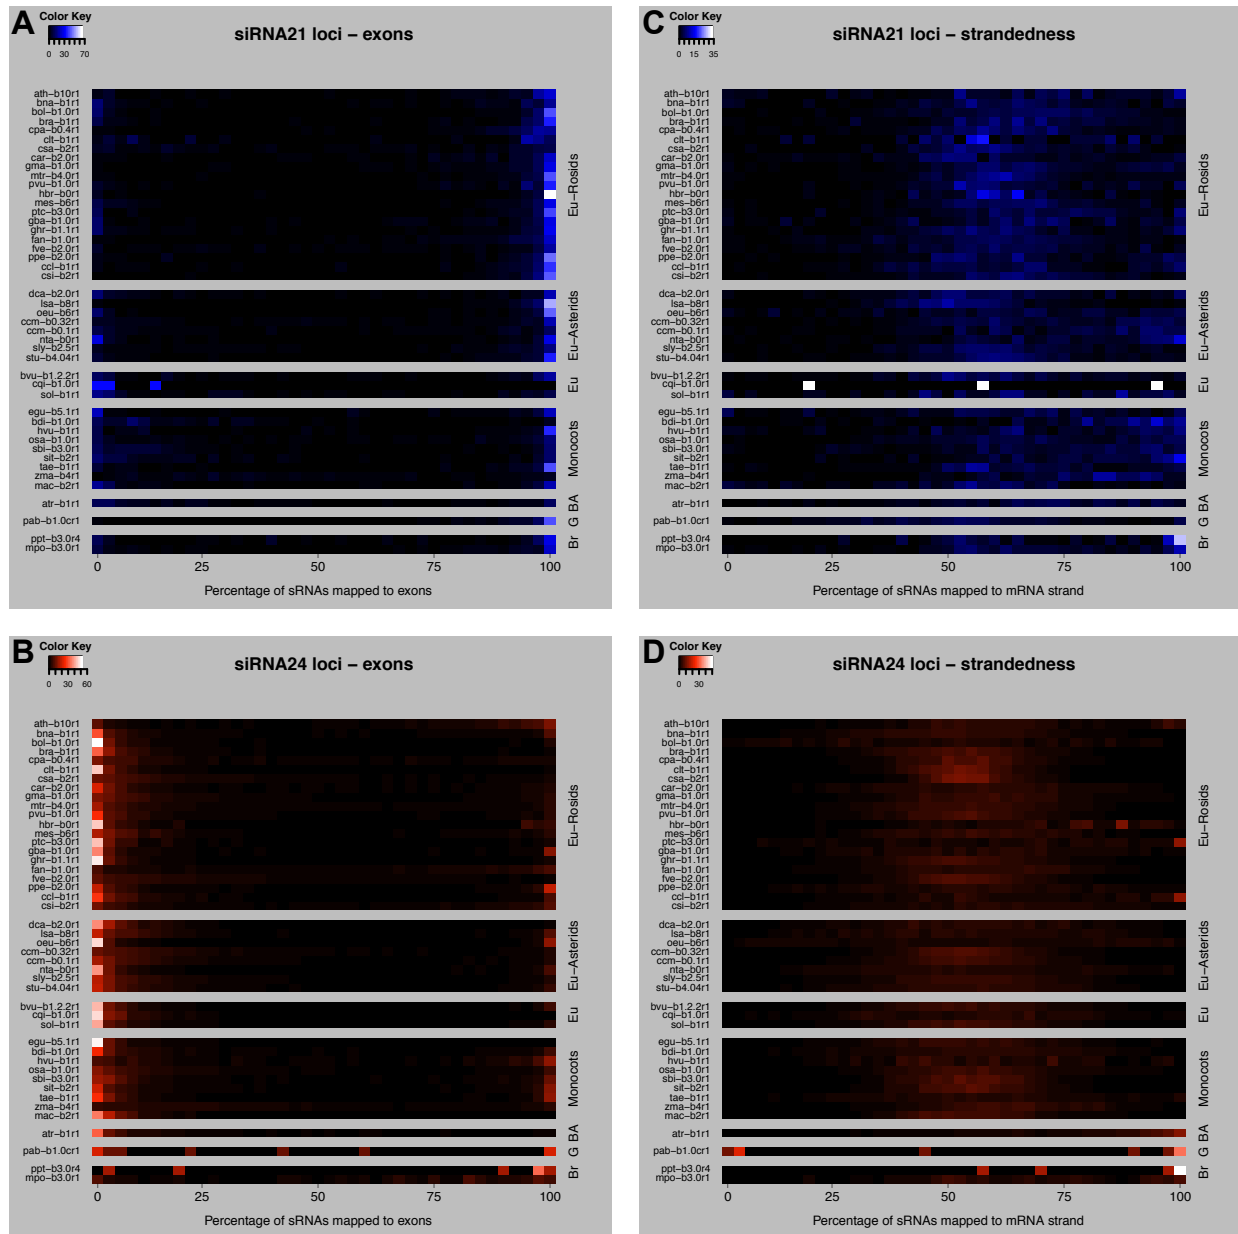

324  
325

326 **Figure 4.** Distribution of sRNAs in the body region of protein-coding mRNAs. **(A)** Heatmap  
327 showing the proportion of mRNAs containing siRNA21 loci that have 0% to 100% of their  
328 aligned sRNAs mapped to their exons. 0% means all sRNAs map to introns, 100% means all  
329 sRNAs map to exons. **(B)** as in A, except for siRNA24 loci. **(C)** Heatmap showing the proportion  
330 of mRNAs containing siRNA21 loci with 0% to 100% of their aligned sRNAs mapped to the  
331 coding strand of the mRNA: 0% means all sRNAs map to the non-coding strand, 100% blue  
332 means all sRNAs map to the coding strand of the mRNA. **(D)** as in C, except for siRNA24 loci.  
333 Each row is a given species (See Table 1 for species codes), grouped taxonomically. Eu: eudicots,  
334 BA: basal angiosperm, G: gymnosperm, Br: bryophyte.

335  
336

#### Identity of genes associated with sRNA loci

337  
338  
339  
340  
341  
342  
343  
344  
345  
346  
347  
348  
349  
350  
351  
352  
353  
354  
355  
356  
357  
358  
359  
360  
361  
362  
363  
364  
365  
366

To begin to understand the function of genes associated with siRNA loci, we performed GO enrichment analysis on the protein-coding genes that contained siRNA21 or siRNA24 loci, or siRNA24 loci in their 1 kb upstream region (Figure 5). For 38 of the 48 plant genomes, we were able to easily retrieve adequate GO annotations. These were used to perform Fisher's Exact Test in Blast2GO in each species (FDR < 0.05). We plotted the frequency at which the GO terms were found enriched amongst the species to find conserved terms (Figure 5A). Enriched GO terms commonly found in at least ten species were considered to be well conserved, because at this number the frequency distribution inverted after gradually decreasing to zero. Genes containing siRNA21 and siRNA24 loci had respectively two and eight well conserved GO terms. In contrast, genes with siRNA24 loci within their 1 kb upstream region had no enriched GO term shared by ten or more species. The species distribution of the well conserved GO terms (Figure 5B) revealed that the "ADP binding" term was enriched in genes containing siRNA21 loci in rosids, asterids, in *A. trichopoda* and only in one monocot (wheat). Genes associated with the ADP binding function corresponded in all species with NB-LRR type disease resistance genes, which are known to produce secondary siRNAs in many species and only in barley and wheat amongst the monocots (Liu et al. 2014; Zhang et al. 2019). The "protein binding" term was also enriched in genes containing siRNA21 loci, but the genes associated with this term had heterogeneous and variable annotations between species, therefore no single common pathway was identified. Nevertheless, a few gene families in the "protein binding" group were commonly found amongst species, for example F-box genes, PPR-containing genes, kinases and SET domain containing genes. Genes containing siRNA24 loci had well conserved enriched GO terms mostly found in all clades and with different molecular functions (Figure 5B): "terpene synthase" and "heme binding" (mostly cytochromes P450 and other peroxidases) were the most conserved, followed by five others, including the "ADP binding" function. We hypothesize that the genes with these specific functions might be particularly frequent targets of intronic TE insertions silenced by 24 nucleotide siRNAs.

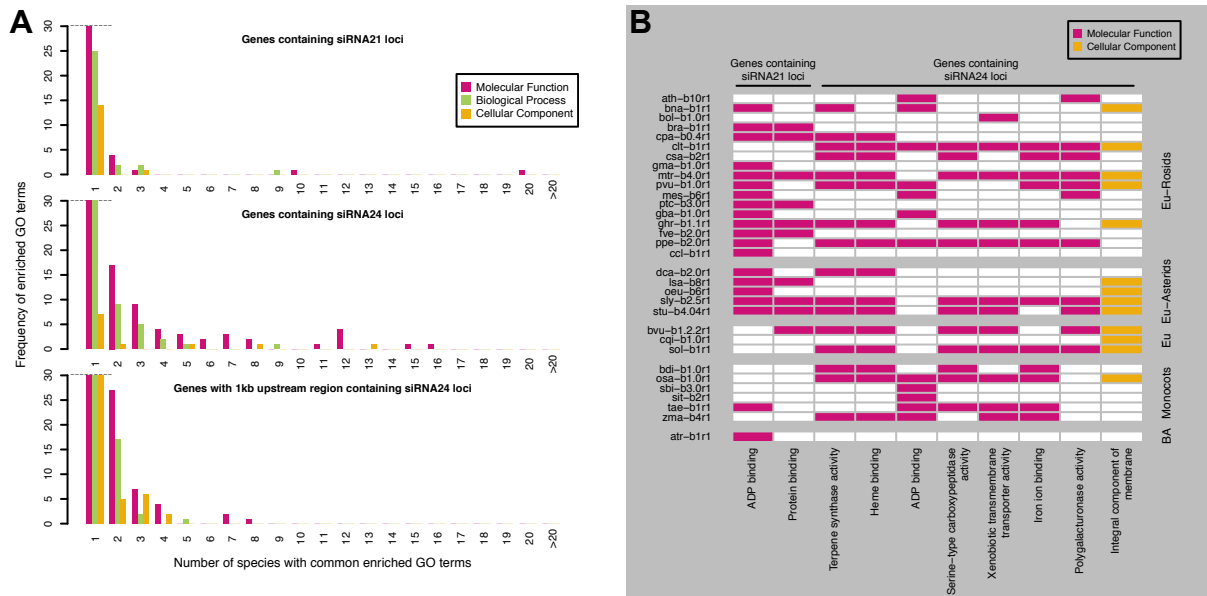

367  
368

369 **Figure 5.** GO enrichment analysis of protein-coding genes associated with siRNA21 or siRNA24  
370 loci. **(A)** Frequency of enriched GO terms in the 38 species analyzed (hbr-b0, tcc-b1.1, fan-b1.0,  
371 mdm-b3.0, csi-b2, ccm-b0.32, ccm-b0.1, can-b1.6, nta-b0 and hvu-b1 were excluded because  
372 no gene annotation or no GO annotation was available). **(B)** Species distribution of well  
373 conserved enriched GO terms, common to ten or more plant species (car-b2.0, egu-b5.1, mac-  
374 b2, pab-b1.0c, ppt-b3.0 and mpo-b3.0 were not displayed because they were not enriched in  
375 any of these terms). Each row is a given species (See Table 1 for species codes), grouped  
376 taxonomically. Eu: eudicots, BA: basal angiosperm.

377

### 378 Disease resistance genes and other genes producing siRNAs in monocots

379

380 We further examined the nature of the genes containing exonic sRNA loci in monocots.  
381 This was of interest because the regulation of disease resistance genes by sRNAs in monocots  
382 has been described only in barley and wheat so far (Liu et al. 2014; Zhang et al. 2019). Genes  
383 containing exonic siRNA21 and siRNA22 loci were both studied, because within the monocots,  
384 maize produced high quantities of 22 nucleotide siRNAs (Figure 1), whose function is not well-  
385 understood. The genes were manually screened to discard those with stacks of sRNA reads  
386 mapped at only one or two unique positions, that could be alignment artifacts or miRNA-like  
387 sRNAs. Known miRNA matches, lowly expressed sRNA loci (< 1 RPM, reads per million),  
388 transposons and inverted repeats were also discarded. In total, 524 genes in the nine monocots  
389 were selected as containing robust siRNA21 and siRNA22 loci (Figure 6A, Supplemental Table  
390 S3). Maize was the only species where the majority of genic siRNA loci were siRNA22 loci;  
391 wheat also had some genic siRNA22 loci. This suggests that in maize and maybe wheat, the 22  
392 nucleotide siRNAs could be a functionally active class of sRNAs in the regulation of genes, in  
393 addition to the 21 nucleotide siRNAs.

394 Evidence of sRNA expression from genes annotated as or having sequence homology  
395 with disease resistance genes, was found in seven species (Supplemental Table S3). Confirming



396 previous reports, 13 disease resistance genes in barley and 48 in wheat contained siRNA21 loci.  
397 In oil palm and banana, 33 and 34 disease resistance genes, produced 21 nucleotide siRNAs,  
398 respectively. Disease resistance genes evolve rapidly by tandem duplications (Yang and Huang  
399 2014), whose expression may be controlled by siRNAs. In the banana genome we found an  
400 example of this where two clusters of disease resistance genes, both on chromosome 3,  
401 contained 23 and 15 genes in tandem in a range of ~137 and ~130kb, respectively, that were  
402 sources of 21 nucleotide siRNAs. In *B. distachyon* and sorghum, we found seven and six  
403 resistance genes producing 21 nucleotide siRNAs, respectively, while in maize only one  
404 resistance gene produced 22 nucleotide siRNAs. In rice and foxtail millet there were no disease  
405 resistance genes associated with exonic 21 or 22 nucleotide siRNAs. This result suggests that  
406 the siRNA-mediated regulation of resistance genes could be conserved in a larger number of  
407 monocots than just barley and wheat but be selectively absent in some other monocots like  
408 rice.

409 Genes with different functions than resistance genes also contained siRNA21 and  
410 siRNA22 loci in monocots and a few were conserved in multiple species (Supplemental Table  
411 S3). Example of these genes include: *TAS3* genes, auxin responsive genes, kinase genes, genes  
412 encoding transport inhibitor response 1-like (TIR1-like) proteins, predicted E3 ubiquitin ligase  
413 genes, genes encoding or similar to DNA-directed RNA polymerases, two-component response  
414 regulators and methyl-CpG-binding domain-containing proteins. Genes participating in sRNA  
415 pathways were also found to be sources of siRNAs: *HEN1 SUPPRESSOR1 (HESO1)*, Figure 6B) and  
416 *AGO108* in maize, *DOMAINS REARRANGED METHYLTRANSFERASE 2 (DRM2)* in rice, a predicted  
417 *AGO1B* in sorghum and three predicted copies of *AGO2* in wheat. As it is visible by the sRNA  
418 alignment coverage in *HESO1* (Figure 6B), sRNAs were expressed from multiple adjacent exons.  
419 This pattern of sRNA expression that reflects the mature mRNA structure was observed in many  
420 genes and strongly suggests that these exonic 21 and 22 nucleotides sRNAs are secondary  
421 siRNAs, originated from the processing of the mRNA by a DCL protein.  
422

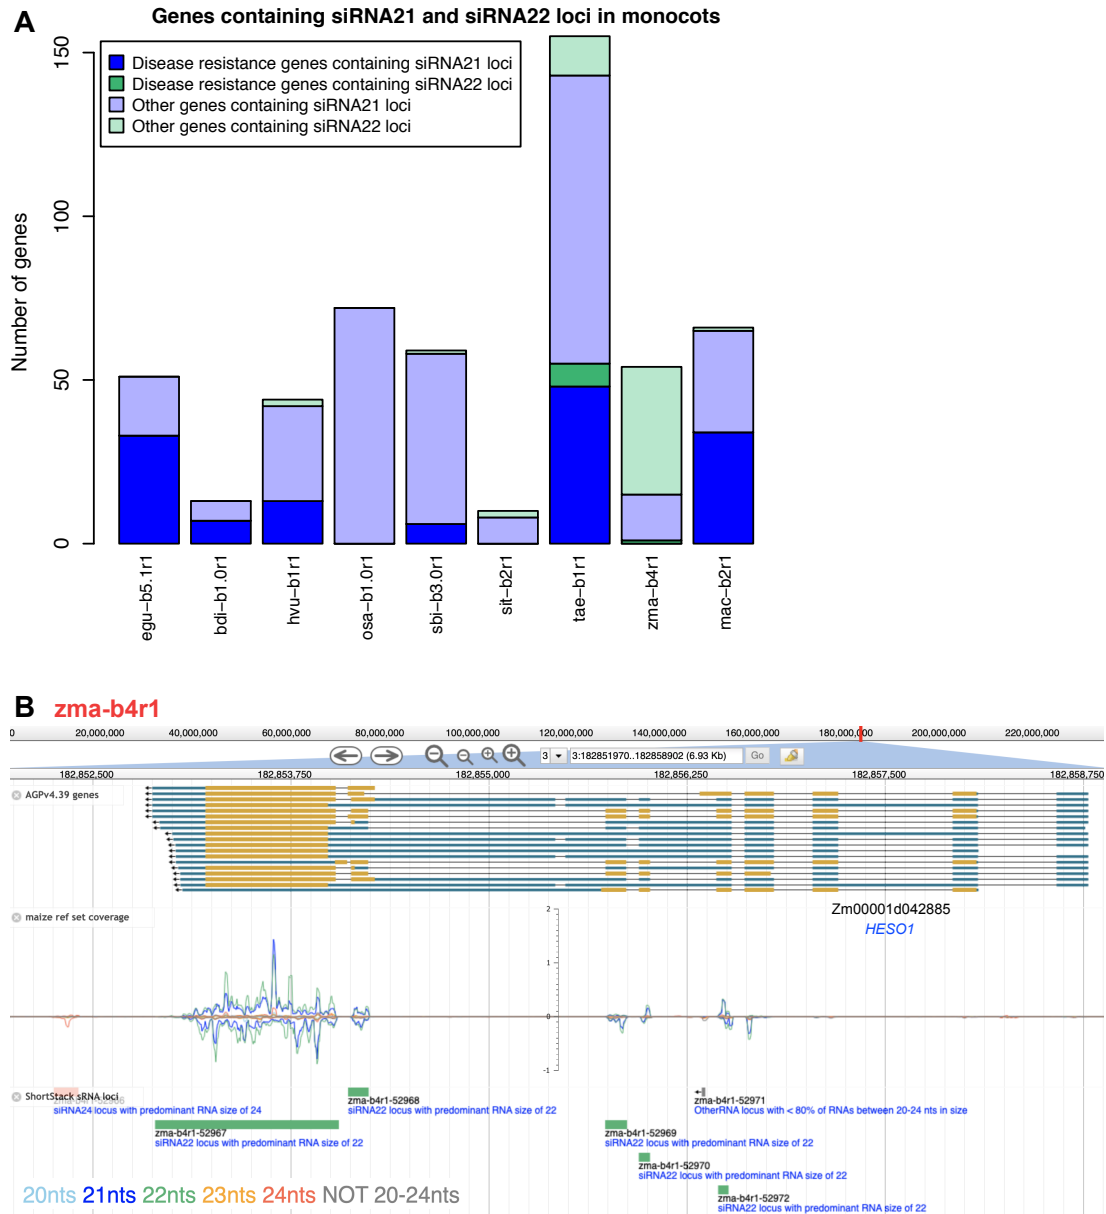

423  
424

425 **Figure 6.** Genes containing siRNA21 and siRNA22 loci in nine monocot species. **(A)** Counts of  
426 genes containing siRNA21 and siRNA22 loci in monocots. **(B)** Screenshot of genome browser for  
427 maize *HES01* (Zm00001d042885). Top row: mRNA structure: blue blocks for UTRs, yellow  
428 blocks for CDS and black lines for introns. Middle row: sRNA-seq coverage from the reference  
429 set across the gene. Bottom row: ShortStack sRNA loci annotation.

430

### 431 Analysis of sRNA conservation across plant species

432

433 Annotated sRNA loci were grouped into putative families based on the sequences of the  
434 most abundant single sRNA (the 'major RNA') produced by each locus (Supplemental Table S4).  
435 Loci were considered to be members of the same family if the sequences of their major RNAs

436 had up to two mismatches with each other; these criteria are similar to those commonly used  
 437 to group *MIRNA* loci into families. Most of the resulting families (1,556,834; 85.3%) had only a  
 438 single locus (Figure 7A) and relatively few families (38,794; 2.1%) were present in more than a  
 439 single species (Figure 7B). Even fewer families (1,968; 0.1%) were present in more than one  
 440 major taxonomic group (Figure 7C). In general, the proportions of MIRNA, nearMIRNA, and  
 441 siRNA21 loci were higher for more extensively conserved families (Figure 7D-F); at the most  
 442 extreme levels of conservation, MIRNA loci and siRNA21 loci predominated.  
 443

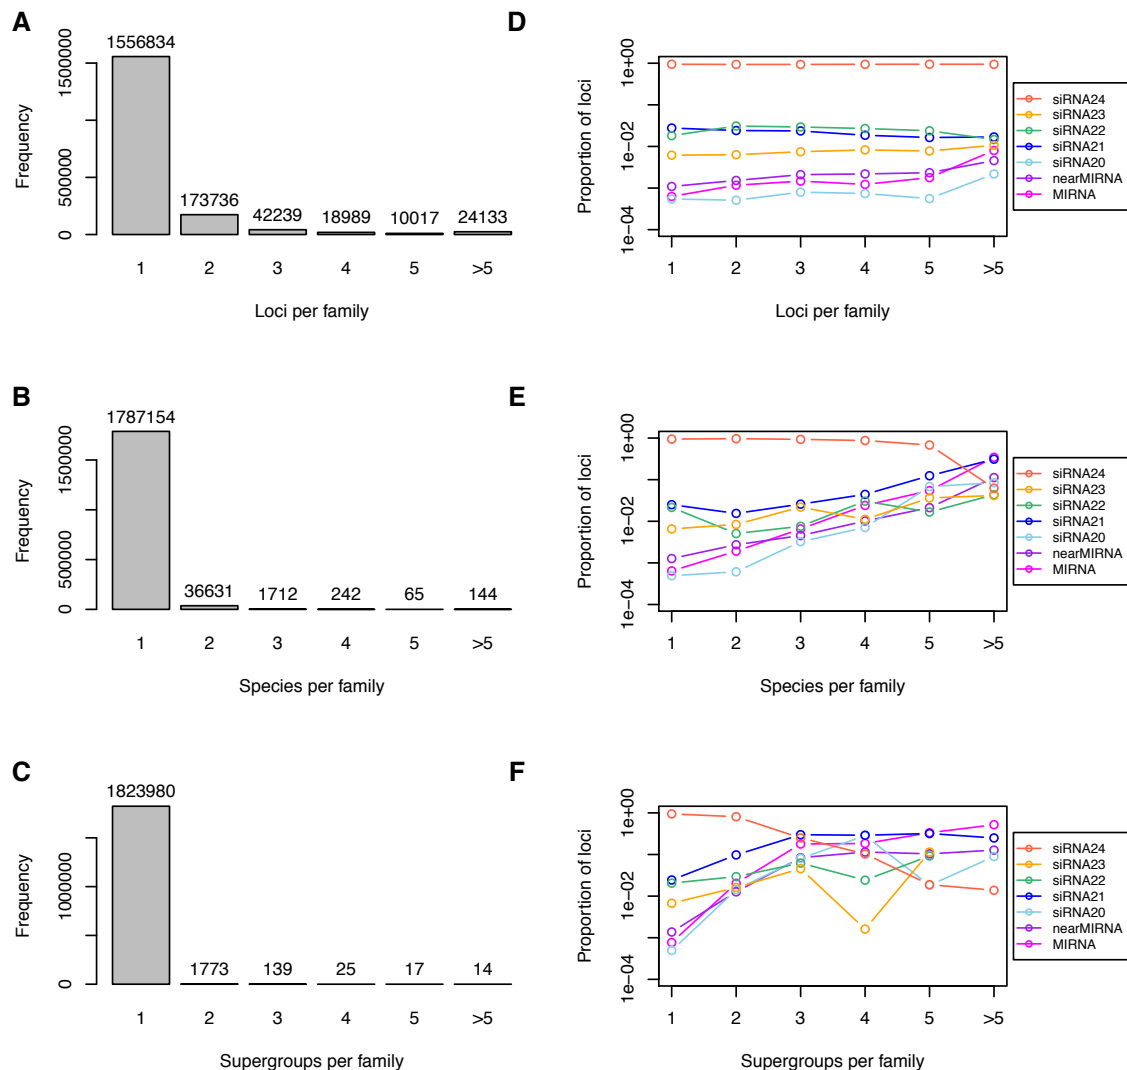

444  
 445  
 446 **Figure 7.** Conservation of sRNA loci in plants. **(A)** Frequency distribution of number of sRNA loci  
 447 per putative sRNA family. **(B)** Frequency distribution of number of distinct plant species per  
 448 putative sRNA family. **(C)** Frequency distribution of number of plant 'supergroups' per putative  
 449 sRNA family. Supergroups defined in this study are: rosids, asterids, other eudicots, monocots,  
 450 basal angiosperms, gymnosperms, and bryophytes. **(D)** Proportions of types by number of loci  
 451 per putative sRNA family. **(E)** Proportions of types by number of distinct plant species per

452 putative sRNA family. **(F)** Proportions of types by number of plant 'supergroups' per putative  
453 sRNA family.

454

## 455 **Discussion**

456

### 457 **A public resource on sRNAs for the scientific community**

458

459 We created an extensive resource for a large number of plant genomes that allows  
460 users to freely and easily retrieve, visualize and analyze sRNA loci, including not only miRNA  
461 annotations but also siRNA annotations. Our research extended into non-model systems,  
462 including many species of horticultural importance. For three economically important plants,  
463 spinach, carrot and cacao, we annotated for the first time miRNA and siRNA loci. Recently, a  
464 study published the first miRNA annotation in carrot using high throughput sequencing, but the  
465 siRNAs were not examined (Bhan et al. 2019). In many published works, sRNA-seq is used to  
466 annotate and profile miRNAs but not individual siRNA loci. We used the vast amount of  
467 available sRNA-seq datasets to exploit all this unrevealed information and annotate the entire  
468 population of sRNAs in 48 plant genomes.

469 Our database and analyses are limited by the quality and quantity of the available  
470 genomic annotations and sRNA-seq data. For example, sRNAs expressed in specific tissues/cell  
471 types or growth conditions that were not represented in our sRNA-seq dataset are by  
472 consequence absent from our reference annotations. This might be the case for reproductive  
473 phasiRNAs (Zhai et al. 2015; Fei et al. 2016; Xia et al. 2019): for most of the analyzed species we  
474 did not have any or enough sRNA-seq libraries from male reproductive tissues to allow the  
475 specific annotation of this sRNA population. For this reason, we did not investigate the  
476 reproductive sRNAs in our work. Our database has the potential to be expanded in the future to  
477 include new plant genomes, new annotations and new sRNA-seq data that are of interest for  
478 the plant biology community.

479 Overall, we created a resource that will be useful for future sRNA studies. Thanks to the  
480 standard annotation and classification methods followed for all genomes, our sRNA annotations  
481 and alignments can be directly visualized or downloaded from our web-server and compared  
482 between species. Our web-server is a practical way to quickly interrogate existing plant sRNA  
483 data in a usable format and will enable scientists to rapidly search for evidence of sRNA  
484 expression in specific regions in a species or investigate the conservation of single sRNA  
485 sequences across species.

486

### 487 **Multiple protein-coding gene families are sources of 21 nucleotide siRNAs in dicots and 488 monocots**

489

490 The best characterized case of protein-coding genes generating secondary siRNAs are  
491 the disease resistance genes, whose expression is kept under control by secondary siRNA  
492 production to avoid fitness loss (Yang and Huang 2014). We confirmed expression of 21  
493 nucleotide siRNAs from exons of resistance genes in the rosoid and asterid clades and expanded  
494 the number of monocot species that also showed this evidence, suggesting that this pathway  
495 might be more broadly conserved than what is known. In none of the three studied

496 caryophyllales species the protein-coding genes containing siRNA21 loci were enriched in the  
497 GO:ADP binding term, characteristic of resistance genes. This could result from incomplete  
498 gene/GO annotations in spinach, sugar beet and quinoa, missing real resistance genes.  
499 Alternatively, these secondary siRNAs might be reduced in caryophyllales because the number  
500 of disease resistance genes in this clade is lower compared to the typical expansion of this gene  
501 family in rosids and asterids or because in caryophyllales, specific subfamilies of resistance  
502 genes have expanded that might be differentially regulated (Dohm et al. 2014; Xu et al. 2017;  
503 Funk et al. 2018).

504 In the literature, the number of known protein-coding genes producing secondary  
505 siRNAs in monocots is smaller than in dicots. Accordingly, from our analyses, the enrichment of  
506 siRNA21 loci in protein-coding genes was less evident in monocots compared to dicots and also  
507 the tendency of 21 nucleotide siRNAs to map to exons was smaller in monocots. For these  
508 reasons, we decided to manually screen the monocot species for evidence of 21 nucleotide  
509 siRNA production from protein-coding genes. We described a number of gene families, more or  
510 less conserved in the nine monocots, that produced 21 nucleotide siRNAs, and also 22  
511 nucleotide siRNAs in maize and wheat. In many cases, the siRNAs were expressed specifically  
512 from multiple adjacent exons, supporting the hypothesis that they are secondary siRNAs  
513 processed from mature mRNAs. Some of the genes found were previously described as sources  
514 of secondary siRNAs in other species, for example kinase genes (Zheng et al. 2015; Reyes-Chin-  
515 Wo et al. 2017), TIR1-like genes (Si-Ammour et al. 2011; Seo et al. 2018; Xia et al. 2015a) and  
516 *AGO2* (Arikrit et al. 2014). In addition to *AGO2*, there are more genes participating in siRNA  
517 biogenesis and function that are themselves known targets of siRNA regulation: *DCL1* (Xie et al.  
518 2003; Hu et al. 2015b; Xia et al. 2014), *DCL2* (Zhai et al. 2011; Arikrit et al. 2014), *AGO1*  
519 (Vaucheret et al. 2006) and *SUPPRESSOR OF GENE SILENCING 3* (Arikrit et al. 2014). We found  
520 evidence of siRNA expression from four additional genes involved in siRNA pathways: in maize,  
521 from *AGO108* (also named *AGO5d*), highly expressed in ears but not well functionally  
522 characterized (Zhai et al. 2014), and *HESO1*, a nucleotidyl transferase that uridylylates  
523 unmethylated sRNAs to trigger their degradation (Zhao et al. 2012); in sorghum, from a  
524 predicted *AGO1B* and in rice from *DRM2*. *DRM2* is a known target of miR820 in rice (Nosaka et  
525 al. 2012), which could be the trigger miRNA for the production of the observed 21 nucleotides  
526 siRNAs. We reported many more genes in monocots that spawned 21 or 22 nucleotide long  
527 siRNAs, belonging to different families. These genes represent an interesting set to research in  
528 the future to better characterize the nature of genic siRNAs. The next obvious step will be  
529 searching for possible miRNA triggers and examining the phasing pattern of siRNA expression in  
530 each specific gene, to confirm that these siRNAs are secondary siRNAs.

531

### 532 **Different hypotheses on 22 nucleotide siRNA functions**

533

534 We found that asterids consistently had considerable proportions of siRNA22 loci, while  
535 in the other clades, only certain species (soybean, cassava and maize) had this same trend.  
536 There are several hypotheses that could explain the presence of 22 nucleotide siRNAs in a  
537 genome: they could originate from *MIRNA* or *MIRNA*-like loci that were missed by our  
538 annotation method, from endogenous direct or inverted repeats (Kasschau et al. 2007), or from  
539 protein-coding genes, as we observed in maize. Alternatively, these siRNA22 loci could express

540 siRNAs involved in the non-canonical RdDM pathway to silence active TEs (Matzke and Mosher  
541 2014), as it was proposed for maize (Nobuta et al. 2008). Active retrotransposons have been  
542 described in asterids, for example the Tto1 element or the Tnt1 element, which has many  
543 copies that are still transcriptionally active in tobacco (Casacuberta et al. 1997) and lettuce  
544 (Mazier et al. 2007). In this hypothesis, what still remains unclear is why we observed  
545 expression of 22 nucleotide siRNA most often in the asterids and not in the grasses, where  
546 retrotransposon transcription is very prevalent (Vicient et al. 2001). If the 22 nucleotide siRNAs  
547 come from active retrotransposons, then the ability to detect their expression could depend on  
548 the specific samples analyzed, because retrotransposons are only active during certain stages of  
549 plant development or stress conditions (Flavell et al. 1992). Lastly, 22 nucleotide siRNAs could  
550 target Endogenous Viral Elements, virus segments that are integrated in the host genome, that  
551 form inverted repeats (Pooggin 2018). To understand the role of the siRNA22 loci, the next step  
552 in future research will be the genome-wide profiling of the genomic regions where these loci  
553 map, discriminating between genes, intergenic regions and different classes of TEs.

554

### 555 **Roles of 24 nucleotide siRNAs in regulating protein-coding gene expression**

556

557 We assumed that the distribution of the total sRNA loci across the chromosome length  
558 reflected the distribution of the siRNA24 loci, because these accounted for the vast majority of  
559 loci in angiosperms. *A. thaliana* and Chinese cabbage are two of the few species where siRNA24  
560 loci and gene densities were negatively correlated. In both species, siRNA regulation of TEs near  
561 genes was previously linked to lower expression of the genes (Hollister et al. 2011; Woodhouse  
562 et al. 2014). It would be informative to test if the same link occurs in the other species with  
563 inverse correlation between siRNA24 locus and gene densities, like sweet orange. Differences in  
564 siRNA24 locus distribution and influence on gene expression might be directly explained by  
565 differences in TE composition between genomes. Accordingly, it was previously suggested that  
566 the transcription of gene networks can be balanced by the genome distribution of TEs (Freeling  
567 et al. 2015), which can be highly variable among species (Vicient and Casacuberta 2017). In  
568 many cases, a few TE families have increased their copy number in one lineage (Baidouri and  
569 Panaud 2013). For example, a single type of LTR retrotransposon is responsible for most of the  
570 hot pepper genome expansion (Park et al. 2012).

571

572 The angiosperms analyzed were strongly enriched in siRNA24 loci in the 5'-proximal  
573 regions upstream of protein-coding genes. In *A. thaliana*, this distribution was much less strong  
574 but the enrichment of siRNA24 loci in the 5' upstream region compared to the gene body  
575 region was still evident. The function of siRNA24 loci at these sites has been widely studied in  
576 maize: near genes, 24 nucleotide siRNAs engage RdDM, blocking the spread of open, active  
577 chromatin into adjacent transposons (Li et al. 2015). In addition to silencing TEs, the RdDM  
578 activity near genes in *A. thaliana* can also affect the expression levels of the genes (Zheng et al.  
579 2013; Zhong et al. 2012), likely by changing the chromatin landscape at gene promoters and  
580 influencing the ability of transcription factors to bind to the promoters and stimulate  
581 transcription. In maize on the contrary, no obvious direct effects on gene expression were  
582 detected as a consequence of the loss of gene proximal 24 nucleotide siRNAs (Lunardon et al.  
583 2016). Finally, in *A. thaliana*, it has been speculated that the RdDM activity near genes can  
influence their expression by inhibiting interactions between the promoters and their potential

584 distant regulatory elements (Rowley et al. 2017). Similarly, most angiosperms were also  
585 enriched in siRNA24 loci at the 3'-proximal regions downstream of genes, where the RdDM  
586 activity seems to reduce the readthrough transcription by Pol II into neighboring genes or TEs  
587 (Erhard et al. 2015).

588 When siRNA24 loci were found inside protein-coding genes, they were mostly in introns.  
589 A few gene families were most commonly targeted by 24 nucleotide siRNAs in both dicots and  
590 monocots. Two possible reasons might explain why these specific genes were a common target  
591 of 24 nucleotide siRNAs. On one side, families like disease resistance genes evolve rapidly,  
592 creating high numbers of partial genes and pseudogenes (Luo et al. 2012) that might be  
593 suppressed by the activity of 24 nucleotide siRNAs (Kasschau et al. 2007). This could also be the  
594 case of polygalacturonases that are encoded by a large gene family. An accurate study of the  
595 protein-coding gene annotations, precisely separating genes from pseudogenes, would be  
596 necessary to verify this hypothesis. On the other side, gene families like disease resistance  
597 genes control adaptive responses to the environment, making them frequent targets of TE  
598 transposition events (Quadrona et al. 2016). Although the majority of TE insertions in genes are  
599 deleterious, they can be advantageous and therefore be retained as source of variability, which  
600 is essential in environmental response genes to adapt to the ever-changing environment. As a  
601 consequence, new TE insertions are overrepresented in genes that respond to environmental  
602 stresses (Grover et al. 2003; Miyao et al. 2003). Also in cytochrome P450s, a family known to  
603 participate in stress responses, frequent TE insertions were described as a strategy for  
604 variability (Chen and Li 2007) and this could explain why these genes were frequent targets of  
605 24 nucleotide siRNAs. Likewise, serine-type carboxypeptidases, which participate in protein  
606 degradation, and xenobiotic transmembrane transporters, which work in xenobiotic  
607 detoxification pathways together with cytochromes P450, both play pivotal roles in plant  
608 defense responses and therefore could be frequent targets of TE insertions controlled by 24  
609 nucleotide siRNAs. To verify if the intronic 24 nucleotide siRNAs influence the regulation of the  
610 genes that they target, it will be informative in the future to examine mutants lacking the  
611 production of 24 nucleotide siRNAs and observe if these gene families tend to be altered in  
612 their expression.

### 613 614 **Conservation of siRNAs**

615  
616 The sequence comparison of the most abundant sRNA expressed from each locus  
617 revealed a very low level of conservation of siRNAs across species, not just between distant  
618 species but also between close relatives. Studying the conservation of siRNAs is complicated by  
619 the fact that the siRNA population can vary substantially between different organs of the same  
620 plant species (Ha et al. 2009). Nonetheless, our result is in line with previous observations (Ma  
621 et al. 2010). If we consider plants that all have a strong peak of 24 nucleotide siRNAs and have a  
622 functional RdDM pathway, the genomic TE composition and organization can significantly differ  
623 between different species and even between different varieties of the same species (Brunner et  
624 al. 2005; Quadrona et al. 2016). This might explain why the individual siRNA sequences that  
625 target the TEs are also poorly conserved. Much of our knowledge regarding sRNAs comes from  
626 model plants like *A. thaliana*, which has a low amount of TEs that are not active in wild-type  
627 plants. Crop genomes, instead, have high TE loads and some TEs are active in wild-type genetic

628 backgrounds in maize and rice (Jiang et al. 2003; Nakazaki et al. 2003; Lisch 2012). Due to these  
629 differences it is important to study sRNAs in non-model systems, because lineage- or species-  
630 specific sRNAs might be associated to traits that other plants lack or have not evolved (Chen et  
631 al. 2018).

632

633

## 634 **Methods**

635

### 636 **Plant material and sRNA sequencing**

637

638 Leaves of *Theobroma cacao* (line Scavina 6) were kindly provided by Dr. M. Guiltinan of  
639 The Pennsylvania State University, from plants grown in greenhouse conditions. The tips of  
640 leaves at the immature green leaf stage were collected. *Daucus carota* (cultivar 'Burpee') was  
641 grown in a growth room at 22°C, 16h light 8h dark regime and leaves and roots from 5- and 6-  
642 week-old plants, respectively, were sampled. *Spinacia oleracea* Sp75 inbred line seeds were  
643 kindly provided by Dr. Z. Fei of the Boyce Thompson Institute, Cornell University, and grown in a  
644 growth room at 22°C, 16h light 8h dark regime. Leaves from 3- and 5-week-old plants were  
645 collected. *Zea mays* B73 inbred line seeds were germinated on ProMix B, then transferred to  
646 soil in pots and grown in greenhouse conditions with occasional Osmocote fertilization. The  
647 fifth and the sixth leaves from V5 plants, mature pollen and 21-27 DAP (days after pollination)  
648 embryo tissue were collected from a pool of plants. All samples were flash frozen in liquid  
649 nitrogen, stored at -80°C and then ground with liquid nitrogen cooled mortar and pestle. For  
650 carrot, spinach and maize, the RNA was extracted with Tri-reagent (Sigma) as per manufacturer  
651 instructions, adding a second sodium-acetate-ethanol precipitation and ethanol wash step. For  
652 cacao, the RNA was extracted with PureLink Plant RNA Reagent (Life technologies) following  
653 manufacturer's suggestions. Sequencing libraries were prepared using the NEB Next sRNA-seq  
654 library preparation kit for Illumina (NEB, E7300S) following manufacturer's suggestions.  
655 Reactions were purified and size selected for sRNAs 15-40nt in length by PAGE. Extracted bands  
656 were quantified by qPCR and quality-controlled by high-sensitivity DNA chip (Agilent).  
657 Sequencing was performed on a HiSeq2500 (Illumina) in rapid run mode (50 nucleotides, single-  
658 end, single barcode) by the Penn State genomics core.

659

### 660 **sRNA-seq data processing**

661

662 sRNA-seq raw fastq files were downloaded from SRA and GEO databases (Supplemental  
663 Table S1). The libraries were processed to remove the 3' adapter with cutadapt (Martin 2011)  
664 (cutadapt -a 3'\_adapter\_sequence --discard-untrimmed -m 15 -o output\_file.fastq  
665 input\_file.fastq). Reads containing the 5' adapter were removed with cutadapt (cutadapt -g  
666 5'\_adapter\_sequence --discard-trimmed -m 15 -o output\_file.fastq input\_file.fastq). Low quality  
667 reads were discarded with FASTX-Toolkit (Gordon and Hannon 2010) (fastq\_quality\_filter -q 20  
668 -p 85 -Q 33 -v -i input\_file.fastq -o output\_file.fastq). Finally, reads quality was checked with  
669 FastQC (Andrews 2010): if additional sequencing adapters were overrepresented amongst  
670 reads, they were eliminated from the fastq files with a custom Perl script.

671



## 672 Pipeline to create reference sRNA loci annotations

673

674 For each species, the reference annotation of sRNA loci was created with the following  
675 steps. Each individual library was aligned to the genome (see  
676 <https://plantsmallrnagenes.science.psu.edu> for list of genome assemblies used) using  
677 ShortStack v3.8.1 (Axtell 2013b; Johnson et al. 2016) with default parameters. Libraries with  
678 less than 2 million mapped reads were discarded. Clusters of sRNAs were *de novo* identified in  
679 each library independently with ShortStack (ShortStack --bamfile *alignment\_file.bam* --mincov  
680 2rpm --genomefile *genome\_file.fa*). The sRNA clusters files from all libraries of the same species  
681 were intersected with the bedtools function 'multiIntersectBed' (Quinlan and Hall 2010) with  
682 default parameters. Only genomic intervals with annotated sRNA clusters common to at least  
683 three libraries were kept and merged with bedtools, with 25 nucleotides as maximum distance  
684 allowed between the intervals to be merged into sRNA loci (mergeBed -d 25 -i  
685 *input\_intervals\_file.bed* > *output\_merged\_intervals\_file.bed*). sRNA loci with length < 15  
686 nucleotides were removed with a custom Perl script. Finally, sRNA loci whose expression was <  
687 0.5 RPM in all libraries were also removed. The sRNA loci that were selected after applying  
688 these filters represented the reference annotation for each species.

689

## 690 Analysis of sRNA loci occupancy relative to protein-coding genes

691

692 Locations of protein-coding genes were determined from public GFF3 files from each  
693 genome. Intergenic regions were calculated using bedtools 'complement', computationally cut  
694 in half, and associated with their nearest protein-coding genes using bedtools 'closest'. The  
695 regions were marked as upstream or downstream based on the orientation of their nearest  
696 flanking gene. Per-nucleotide overlap between upstream, downstream, and gene-body regions  
697 vs. small RNA loci were calculated using bedtools 'overlap'. The lengths of gene-bodies were  
698 scaled to 1,000 arbitrary units (each such unit is 0.1% of the gene length). Coverage was  
699 summarized in 25 nucleotides / unit bins, and normalized to a scale of 0 to 1, where 1  
700 represented the maximum fraction occupancy observed in that genome.

701

## 702 Analysis of sRNA distribution in exons and introns of protein-coding mRNAs

703

704 Only protein-coding mRNAs having at least one intron and overlapping with siRNA21  
705 and siRNA24 loci were studied. Each mRNA was either classified as containing siRNA21 or  
706 siRNA24 loci: in case of overlap with both siRNA21 and siRNA24 loci, the longest sRNA locus  
707 was considered. The number of sRNAs mapped to exons and to the same strand of protein-  
708 coding mRNAs containing one or more introns were calculated with the bedtools function  
709 'coverageBed -counts' (parameters added for exons: '-F 1'; for the same strand: '-F 1 -s'). The  
710 number of sRNAs mapped to introns and to the opposite strand of the mRNAs were also  
711 calculated for the final ratios (parameters added for the opposite strand: '-F 1 -S'). The  
712 percentage of sRNAs mapped to exons was calculated based on the ratio 'number of reads  
713 mapped to exons / (number of reads mapped to exons + number of reads mapped to introns)'.  
714 The percentage of sRNAs mapped to the same strand of the mRNA was calculated based on the  
715 ratio 'number of reads mapped to the same strand / (number of reads mapped to the same

716 strand + number of reads mapped to the opposite strand)'. Here and in the other analyses of  
717 siRNAs, sRNA loci classified as MIRNA and nearMIRNA or whose most abundant sequence had a  
718 perfect match with a high-confidence plant miRNA hairpin annotated in miRBase v22  
719 (Kozomara and Griffiths-Jones 2014) were not included.

720

## 721 **GO enrichment analysis**

722

723 Protein-coding genes were classified as containing siRNA21 or siRNA24 loci and as  
724 flanked in their 1kb upstream region by siRNA21 or siRNA24 loci: when the same  
725 gene/upstream region overlapped with both siRNA21 and siRNA24 loci, the longest sRNA locus  
726 determined the classification. The GO enrichment analysis was performed with Blast2GO (Götz  
727 et al. 2008), using the Fisher's Exact Test with default parameters (FDR < 0.05). Only the species  
728 for which we were able to retrieve a GO annotation were analyzed, this excluded: hbr-b0, tcc-  
729 b1.1, fan-b1.0, mdm-b3.0, csi-b2, ccm-b0.32, ccm-b0.1, can-b1.6, nta-b0 and hvu-b1.

730

## 731 **Analysis of genes containing siRNA21 and siRNA22 loci in monocots**

732

733 To find all genes containing siRNA21 and siRNA22 loci in exons we used bedtools  
734 (`intersectBed -wao -F 0.75 -a exons_file.gff3 -b sRNA_loci_file.gff3 >`  
735 `output_intersection_file.txt`). When the same gene contained both siRNA21 and siRNA22 loci, if  
736 it contained a greater number of siRNA21 loci than siRNA22 loci it was classified as containing  
737 siRNA21 loci. In case there were the same number of siRNA21 and siRNA22 loci, the gene was  
738 classified based on the longest locus. The description of the genes (Supplemental Table S3) was  
739 copied from the gene annotation files retrieved from the same online resources used for the  
740 genome sequences (see <https://plantsmallrnagenes.science.psu.edu> for sources of genomes  
741 and gene annotations files). For species without available gene annotations, the function of the  
742 genes was predicted using BLAST (Camacho et al. 2009) on the gene sequence and considering  
743 the best result.

744

## 745 **Data access**

746

747 All sRNA-seq libraries used, published and newly generated, are available in GEO and SRA; see  
748 Supplemental Table S1 for accession numbers. All data and analyses are hosted at  
749 <https://plantsmallrnagenes.science.psu.edu>.

750

## 751 **Acknowledgements**

752 We thank the Penn State Genomics Core Facility for small RNA sequencing services, and the  
753 Eberly College of Science IT office for providing server hosting services for this project. We  
754 thank Matthew Jones-Rhoades for supervision and mentoring of undergraduate researchers  
755 and for insightful comments on the manuscript. This work was supported by an award from the  
756 US National Science Foundation (Award 1339207) to MJA.

757

## 758 **Author Contributions**

759 AL and MJA generated most primary annotations and most analyses, with some primary  
760 annotations also contributed by SP. The project website was developed by MJA. NRJ, EH, TP,  
761 and CC contributed small RNA sequencing results. The manuscript was written by AL and MJA  
762 with input from NRJ and CC.

763

## 764 **References Cited**

765

766 Allen E, Xie Z, Gustafson AM, Carrington JC. 2005. microRNA-directed phasing during trans-  
767 acting siRNA biogenesis in plants. *Cell* **121**: 207–21.

768 Andrews S. 2010. Babraham Bioinformatics - FastQC A Quality Control tool for High Throughput  
769 Sequence Data. *FastQC a Qual Control tool high throughput Seq data*.

770 <http://www.bioinformatics.babraham.ac.uk/projects/fastqc>.

771 Arikiti S, Xia R, Kakrana A, Huang K, Zhai J, Yan Z, Valdés-López O, Prince S, Musket TA, Nguyen  
772 HT, et al. 2014. An Atlas of Soybean Small RNAs Identifies Phased siRNAs from Hundreds of  
773 Coding Genes. *Plant Cell* **26**: 4584–601.

774 Axtell MJ. 2013a. Classification and Comparison of Small RNAs from Plants. *Annu Rev Plant Biol*  
775 **64**: 137–59.

776 Axtell MJ. 2013b. ShortStack: Comprehensive annotation and quantification of small RNA  
777 genes. *RNA* **19**: 740–51.

778 Axtell MJ, Bartel DP. 2005. Antiquity of MicroRNAs and Their Targets in Land Plants. *Plant Cell*  
779 **17**: 1658–73.

780 Axtell MJ, Bowman JL. 2008. Evolution of plant microRNAs and their targets. *Trends Plant Sci*  
781 **13**: 343–9.

782 Baidouri M El, Panaud O. 2013. Comparative genomic paleontology across plant kingdom  
783 reveals the dynamics of TE-driven genome evolution. *Genome Biol Evol* **5**: 954–65.

784 Banks JA, Nishiyama T, Hasebe M, Bowman JL, Gribskov M, DePamphilis C, Albert VA, Aono N,  
785 Aoyama T, Ambrose BA, et al. 2011. The selaginella genome identifies genetic changes  
786 associated with the evolution of vascular plants. *Science (80- )* **332**: 960–3.

787 Bhan B, Koul A, Sharma D, Manzoor MM, Kaul S, Gupta S, Dhar MK. 2019. Identification and  
788 expression profiling of miRNAs in two color variants of carrot (*Daucus carota* L.) using deep  
789 sequencing. *PLoS One* **14**: e0212746.

790 Brunner S, Fengler K, Morgante M, Tingey S, Rafalski A. 2005. Evolution of DNA Sequence  
791 Nonhomologies among Maize Inbreds. *Plant Cell* **17**: 343–60.

792 Camacho C, Coulouris G, Avagyan V, Ma N, Papadopoulos J, Bealer K, Madden TL. 2009. BLAST+:  
793 Architecture and applications. *BMC Bioinformatics* **10**: 421.

794 Casacuberta JM, Vernhettes S, Audeon C, Grandbastien M-A. 1997. Quasispecies in  
795 retrotransposons: a role for sequence variability in Tnt1 evolution. *Genetica* **100**: 109–17.

796 Chávez Montes RA, De Fátima Rosas-Cárdenas F, De Paoli E, Accerbi M, Rymarquis LA,  
797 Mahalingam G, Marsch-Martínez N, Meyers BC, Green PJ, De Folter S. 2014. Sample  
798 sequencing of vascular plants demonstrates widespread conservation and divergence of  
799 microRNAs. *Nat Commun* **5**: 3722.

800 Chen C, Zeng Z, Liu Z, Xia R. 2018. Small RNAs, emerging regulators critical for the development  
801 of horticultural traits. *Hortic Res* **5**: 63.

802 Chen S, Li X. 2007. Transposable elements are enriched within or in close proximity to

- 803 xenobiotic-metabolizing cytochrome P450 genes. *BMC Evol Biol* **7**: 46.
- 804 Coruh C, Cho SH, Shahid S, Liu Q, Wierzbicki A, Axtell MJ. 2015. Comprehensive Annotation of  
805 *Physcomitrella patens* Small RNA Loci Reveals That the Heterochromatic Short Interfering  
806 RNA Pathway Is Largely Conserved in Land Plants. *Plant Cell* **27**: 2148–62.
- 807 Coruh C, Shahid S, Axtell MJ. 2014. Seeing the forest for the trees: Annotating small RNA  
808 producing genes in plants. *Curr Opin Plant Biol* **18**: 87–95.
- 809 Cuperus JT, Fahlgren N, Carrington JC. 2011. Evolution and Functional Diversification of MIRNA  
810 Genes. *Plant Cell* **23**: 431–42.
- 811 Dohm JC, Minoche AE, Holtgräwe D, Capella-Gutiérrez S, Zakrzewski F, Tafer H, Rupp O,  
812 Sörensen TR, Stracke R, Reinhardt R, et al. 2014. The genome of the recently domesticated  
813 crop plant sugar beet (*Beta vulgaris*). *Nature* **505**: 546–9.
- 814 Dolgosheina E V., Morin RD, Aksay G, Sahinalp SC, Magrini V, Mardis ER, Mattsson J, Unrau PJ.  
815 2008. Conifers have a unique small RNA silencing signature. *RNA* **14**: 1508–15.
- 816 Erhard KF, Talbot JERB, Deans NC, McClish AE, Hollick JB. 2015. Nascent transcription affected  
817 by RNA polymerase IV in *Zea mays*. *Genetics* **199**: 1107–25.
- 818 Fei Q, Yang L, Liang W, Zhang D, Meyers BC. 2016. Dynamic changes of small RNAs in rice  
819 spikelet development reveal specialized reproductive phasiRNA pathways. *J Exp Bot* **67**:  
820 6037–6049.
- 821 Flavell AJ, Dunbar E, Anderson R, Pearce SR, Hartley R, Kumar A. 1992. Ty1-copia group  
822 retrotransposons are ubiquitous and heterogeneous in higher plants. *Nucleic Acids Res* **20**:  
823 3639–44.
- 824 Formey D, Iñiguez LP, Peláez P, Li YF, Sunkar R, Sánchez F, Reyes JL, Hernández G. 2015.  
825 Genome-wide identification of the *Phaseolus vulgaris* sRNAome using small RNA and  
826 degradome sequencing. *BMC Genomics* **16**: 423.
- 827 Freeling M, Xu J, Woodhouse M, Lisch D. 2015. A solution to the c-value paradox and the  
828 function of junk DNA: The genome balance hypothesis. *Mol Plant* **8**: 899–910.
- 829 Funk A, Galewski P, McGrath JM. 2018. Nucleotide-binding resistance gene signatures in sugar  
830 beet, insights from a new reference genome. *Plant J* **95**: 659–71.
- 831 Gent JI, Ellis NA, Guo L, Harkess AE, Yao Y, Zhang X, Dawe RK. 2013. CHH islands: De novo DNA  
832 methylation in near-gene chromatin regulation in maize. *Genome Res* **23**: 628–37.
- 833 Gent JI, Madzima TF, Bader R, Kent MR, Zhang X, Stam M, McGinnis KM, Dawe RK. 2014.  
834 Accessible DNA and Relative Depletion of H3K9me2 at Maize Loci Undergoing RNA-  
835 Directed DNA Methylation. *Plant Cell* **26**: 4903–17.
- 836 Gordon A, Hannon GJ. 2010. Fastx-toolkit. FASTQ/A short-reads pre-processing tools. *Unpubl*  
837 [http://hannonlab.cshl.edu/fastx\\_toolkit](http://hannonlab.cshl.edu/fastx_toolkit).
- 838 Götz S, García-Gómez JM, Terol J, Williams TD, Nagaraj SH, Nueda MJ, Robles M, Talón M,  
839 Dopazo J, Conesa A. 2008. High-throughput functional annotation and data mining with  
840 the Blast2GO suite. *Nucleic Acids Res* **36**: 3420–35.
- 841 Grover D, Majumder PP, Rao CB, Brahmachari SK, Mukerji M. 2003. Nonrandom distribution of  
842 Alu elements in genes of various functional categories: Insight from analysis of human  
843 chromosomes 21 and 22. *Mol Biol Evol* **20**: 1420–4.
- 844 Guo Q, Qu X, Jin W. 2015. PhaseTank: Genome-wide computational identification of phasiRNAs  
845 and their regulatory cascades. *Bioinformatics* **31**: 284–6.
- 846 Ha M, Lu J, Tian L, Ramachandran V, Kasschau KD, Chapman EJ, Carrington JC, Chen X, Wang X-J,

- 847           Chen ZJ. 2009. Small RNAs serve as a genetic buffer against genomic shock in Arabidopsis  
848 interspecific hybrids and allopolyploids. *Proc Natl Acad Sci* **106**: 17835–40.
- 849 Hackenberg M, Rueda A, Gustafson P, Langridge P, Shi BJ. 2016. Generation of different sizes  
850 and classes of small RNAs in barley is locus, chromosome and/or cultivar-dependent. *BMC*  
851 *Genomics* **17**: 735.
- 852 He G, Chen B, Wang X, Li X, Li J, He H, Yang M, Lu L, Qi Y, Wang X, et al. 2013. Conservation and  
853 divergence of transcriptomic and epigenomic variation in maize hybrids. *Genome Biol* **14**:  
854 R57.
- 855 Hollister JD, Smith LM, Guo Y-L, Ott F, Weigel D, Gaut BS. 2011. Transposable elements and  
856 small RNAs contribute to gene expression divergence between Arabidopsis thaliana and  
857 Arabidopsis lyrata. *Proc Natl Acad Sci* **108**: 2322–7.
- 858 Howell MD, Fahlgren N, Chapman EJ, Cumbie JS, Sullivan CM, Givan SA, Kasschau KD,  
859 Carrington JC. 2007. Genome-Wide Analysis of the RNA-DEPENDENT RNA  
860 POLYMERASE6/DICER-LIKE4 Pathway in Arabidopsis Reveals Dependency on miRNA- and  
861 tasiRNA-Directed Targeting. *Plant Cell* **19**: 926–42.
- 862 Hu H, Rashotte AM, Singh NK, Weaver DB, Goertzen LR, Singh SR, Locy RD. 2015a. The  
863 complexity of posttranscriptional small RNA regulatory networks revealed by In Silico  
864 analysis of Gossypium arboreum L. leaf, flower and boll small regulatory RNAs. *PLoS One*  
865 **10**: e0127468.
- 866 Hu H, Yu D, Liu H. 2015b. Bioinformatics analysis of small rnas in pima (Gossypium barbadense  
867 L.). *PLoS One* **10**: e0116826.
- 868 Jiang N, Bao Z, Zhang X, Hirochika H, Eddy SR, McCouch SR, Wessler SR. 2003. An active DNA  
869 transposon family in rice. *Nature* **421**: 163–7.
- 870 Johnson C, Bowman L, Adai AT, Vance V, Sundaresan V. 2007. CSRDB: A small RNA integrated  
871 database and browser resource for cereals. *Nucleic Acids Res* **35**: D829-33.
- 872 Johnson NR, Yeoh JM, Coruh C, Axtell MJ. 2016. Improved placement of multi-mapping small  
873 RNAs. *G3 Genes, Genomes, Genet* **6**: 2103–11.
- 874 Kasschau KD, Fahlgren N, Chapman EJ, Sullivan CM, Cumbie JS, Givan SA, Carrington JC. 2007.  
875 Genome-wide profiling and analysis of Arabidopsis siRNAs. *PLoS Biol* **5**: e57.
- 876 Kim S, Park M, Yeom SI, Kim YM, Lee JM, Lee HA, Seo E, Choi J, Cheong K, Kim KT, et al. 2014.  
877 Genome sequence of the hot pepper provides insights into the evolution of pungency in  
878 Capsicum species. *Nat Genet* **46**: 270–8.
- 879 Klevebring D, Street NR, Fahlgren N, Kasschau KD, Carrington JC, Lundeberg J, Jansson S. 2009.  
880 Genome-wide profiling of Populus small RNAs. *BMC Genomics* **10**: 620.
- 881 Komiya R. 2017. Biogenesis of diverse plant phasiRNAs involves an miRNA-trigger and Dicer-  
882 processing. *J Plant Res* **130**: 17–23.
- 883 Kozomara A, Birgaoanu M, Griffiths-Jones S. 2019. MiRBase: From microRNA sequences to  
884 function. *Nucleic Acids Res* **47**: D155–D162.
- 885 Kozomara A, Griffiths-Jones S. 2014. MiRBase: Annotating high confidence microRNAs using  
886 deep sequencing data. *Nucleic Acids Res* **42**: D68-73.
- 887 Lai YS, Zhang X, Zhang W, Shen D, Wang H, Xia Y, Qiu Y, Song J, Wang C, Li X. 2017. The  
888 association of changes in DNA methylation with temperature-dependent sex  
889 determination in cucumber. *J Exp Bot* **68**: 2899–2912.
- 890 Lelandais-Brière C, Naya L, Sallet E, Calenge F, Frugier F, Hartmann C, Gouzy J, Crespi M. 2009.

- 891 Genome-Wide Medicago truncatula Small RNA Analysis Revealed Novel MicroRNAs and  
892 Isoforms Differentially Regulated in Roots and Nodules. *Plant Cell* **21**: 2780–96.
- 893 Li Q, Gent JI, Zynda G, Song J, Makarevitch I, Hirsch CD, Hirsch CN, Dawe RK, Madzima TF,  
894 McGinnis KM, et al. 2015. RNA-directed DNA methylation enforces boundaries between  
895 heterochromatin and euchromatin in the maize genome. *Proc Natl Acad Sci* **112**: 14728–  
896 33.
- 897 Lisch D. 2012. Regulation of transposable elements in maize. *Curr Opin Plant Biol* **15**: 511–6.
- 898 Liu J, Cheng X, Liu D, Xu W, Wise R, Shen QH. 2014. The miR9863 Family Regulates Distinct Mla  
899 Alleles in Barley to Attenuate NLR Receptor-Triggered Disease Resistance and Cell-Death  
900 Signaling. *PLoS Genet* **10**: e1004755.
- 901 Liu Q, Ding C, Chu Y, Zhang W, Guo G, Chen J, Su X. 2017. Pln24NT: A web resource for plant 24-  
902 nt siRNA producing loci. *Bioinformatics* **33**: 2065–2067.
- 903 Lunardon A, Forestan C, Farinati S, Axtell MJ, Varotto S. 2016. Genome-Wide Characterization  
904 of Maize Small RNA Loci and Their Regulation in the required to maintain repression6-1 ( *rmr6-1* )  
905 Mutant and Long-Term Abiotic Stresses. *Plant Physiol* **170**: 1535–48.
- 906 Luo S, Zhang Y, Hu Q, Chen J, Li K, Lu C, Liu H, Wang W, Kuang H. 2012. Dynamic Nucleotide-  
907 Binding Site and Leucine-Rich Repeat-Encoding Genes in the Grass Family. *Plant Physiol*  
908 **159**: 197–210.
- 909 Ma Z, Coruh C, Axtell MJ. 2010. Arabidopsis lyrata Small RNAs: Transient MIRNA and Small  
910 Interfering RNA Loci within the Arabidopsis Genus. *Plant Cell* **22**: 1090–103.
- 911 Martin M. 2011. Cutadapt removes adapter sequences from high-throughput sequencing reads.  
912 *EMBnet.journal* **17**: 10–12.
- 913 Martinez G, Choudury SG, Slotkin RK. 2017. TRNA-derived small RNAs target transposable  
914 element transcripts. *Nucleic Acids Res* **45**: 5142–5152.
- 915 Matzke MA, Mosher RA. 2014. RNA-directed DNA methylation: An epigenetic pathway of  
916 increasing complexity. *Nat Rev Genet* **15**: 394–408.
- 917 Mazier M, Botton E, Flamain F, Bouchet J-P, Courtial B, Chupeau M-C, Chupeau Y, Maisonneuve  
918 B, Lucas H. 2007. Successful Gene Tagging in Lettuce Using the Tnt1 Retrotransposon from  
919 Tobacco. *Plant Physiol* **144**: 18–31.
- 920 Miyao A, Tanaka K, Murata K, Sawaki H, Takeda S, Abe K, Shinozuka Y, Onosato K, Hirochika H.  
921 2003. Target Site Specificity of the Tos17 Retrotransposon Shows a Preference for  
922 Insertion within Genes and against Insertion in Retrotransposon-Rich Regions of the  
923 Genome. *Plant Cell* **15**: 1771–80.
- 924 Nakano M, Nobuta K, Vemaraju K, Tej SS, Skogen JW, Meyers BC. 2006. Plant MPSS databases:  
925 signature-based transcriptional resources for analyses of mRNA and small RNA. *Nucleic*  
926 *Acids Res* **34**: D731-5.
- 927 Nakazaki T, Okumoto Y, Horibata A, Yamahira S, Teraishi M, Nishida H, Inoue H, Tanisaka T.  
928 2003. Mobilization of a transposon in the rice genome. *Nature* **421**: 170–2.
- 929 Nobuta K, Lu C, Shrivastava R, Pillay M, De Paoli E, Accerbi M, Arteaga-Vazquez M, Sidorenko L,  
930 Jeong D-H, Yen Y, et al. 2008. Distinct size distribution of endogenous siRNAs in maize:  
931 Evidence from deep sequencing in the mop1-1 mutant. *Proc Natl Acad Sci* **105**: 14958–63.
- 932 Nosaka M, Itoh JI, Nagato Y, Ono A, Ishiwata A, Sato Y. 2012. Role of Transposon-Derived Small  
933 RNAs in the Interplay between Genomes and Parasitic DNA in Rice. *PLoS Genet* **8**:  
934 e1002953.

- 935 Nuthikattu S, McCue AD, Panda K, Fultz D, DeFraia C, Thomas EN, Slotkin RK. 2013. The  
936 Initiation of Epigenetic Silencing of Active Transposable Elements Is Triggered by RDR6 and  
937 21-22 Nucleotide Small Interfering RNAs. *Plant Physiol* **162**: 116–31.
- 938 Park M, Park J, Kim S, Kwon JK, Park HM, Bae IH, Yang TJ, Lee YH, Kang BC, Choi D. 2012.  
939 Evolution of the large genome in *Capsicum annuum* occurred through accumulation of  
940 single-type long terminal repeat retrotransposons and their derivatives. *Plant J* **69**: 1018–  
941 29.
- 942 Polydore S, Lunardon A, Axtell MJ. 2018. Several phased siRNA annotation methods can  
943 frequently misidentify 24 nucleotide siRNA-dominated PHAS loci. *Plant Direct* **2**: e00101.
- 944 Pooggin MM. 2018. Small RNA-omics for plant virus identification, virome reconstruction, and  
945 antiviral defense characterization. *Front Microbiol* **9**: 2779.
- 946 Quadrana L, Silveira AB, Mayhew GF, LeBlanc C, Martienssen RA, Jeddloh JA, Colot V. 2016.  
947 The *Arabidopsis thaliana* mobilome and its impact at the species level. *Elife* **5**: e15716.
- 948 Quinlan AR, Hall IM. 2010. BEDTools: A flexible suite of utilities for comparing genomic features.  
949 *Bioinformatics* **26**: 841–2.
- 950 Reyes-Chin-Wo S, Wang Z, Yang X, Kozik A, Arikat S, Song C, Xia L, Froenicke L, Lavelle DO, Truco  
951 MJ, et al. 2017. Genome assembly with in vitro proximity ligation data and whole-genome  
952 triplication in lettuce. *Nat Commun* **8**: 14953.
- 953 Rogers K, Chen X. 2013. Biogenesis, turnover, and mode of action of plant microRNAs. *Plant Cell*  
954 **25**: 2383–2399.
- 955 Rowley MJ, Rothi MH, Böhmendorfer G, Kuciński J, Wierzbicki AT. 2017. Long-range control of  
956 gene expression via RNA-directed DNA methylation. *PLoS Genet* **13**: e1006749.
- 957 Schmitz RJ, He Y, Valdés-López O, Khan SM, Joshi T, Urich MA, Nery JR, Diers B, Xu D, Stacey G,  
958 et al. 2013. Epigenome-wide inheritance of cytosine methylation variants in a recombinant  
959 inbred population. *Genome Res* **23**: 1663–74.
- 960 Seo E, Kim T, Park JH, Yeom SI, Kim S, Seo MK, Shin C, Choi D, Tabata S. 2018. Genome-wide  
961 comparative analysis in Solanaceous species reveals evolution of microRNAs targeting  
962 defense genes in *Capsicum* spp. *DNA Res* **25**: 561–575.
- 963 Shen Y, Sun S, Hua S, Shen E, Ye CY, Cai D, Timko MP, Zhu QH, Fan L. 2017. Analysis of  
964 transcriptional and epigenetic changes in hybrid vigor of allopolyploid *Brassica napus*  
965 uncovers key roles for small RNAs. *Plant J* **91**: 874–893.
- 966 Si-Ammour A, Windels D, Arn-Boulidoires E, Kutter C, Ailhas J, Meins F, Vazquez F. 2011. miR393  
967 and Secondary siRNAs Regulate Expression of the TIR1 / AFB2 Auxin Receptor Clade and  
968 Auxin-Related Development of *Arabidopsis* Leaves. *Plant Physiol* **157**: 683–91.
- 969 Song Q, Guan X, Chen ZJ. 2015. Dynamic Roles for Small RNAs and DNA Methylation during  
970 Ovule and Fiber Development in Allotetraploid Cotton. *PLoS Genet* **11**: e1005724.
- 971 Song QX, Xiang L, Li QT, Chen H, Hu XY, Ma B, Zhang WK, Chen SY, Zhang JS. 2013. Genome-  
972 Wide analysis of DNA methylation in soybean. *Mol Plant* **6**: 1961–74.
- 973 Srivastava S, Zheng Y, Kudapa H, Jagadeeswaran G, Hivrale V, Varshney RK, Sunkara R. 2015.  
974 High throughput sequencing of small RNA component of leaves and inflorescence revealed  
975 conserved and novel miRNAs as well as phasiRNA loci in chickpea. *Plant Sci* **235**: 46–57.
- 976 The International Brachypodium Initiative. 2010. Genome sequencing and analysis of the model  
977 grass *Brachypodium distachyon*. *Nature* **463**: 763–8.
- 978 The Tomato Genome Consortium. 2012. The tomato genome sequence provides insights into

- 979 fleshy fruit evolution. *Nature* **485**: 635–41.
- 980 Vaucheret H, Mallory AC, Bartel DP. 2006. AGO1 Homeostasis Entails Coexpression of MIR168  
981 and AGO1 and Preferential Stabilization of miR168 by AGO1. *Mol Cell* **22**: 129–36.
- 982 Vicient CM, Casacuberta JM. 2017. Impact of transposable elements on polyploid plant  
983 genomes. *Ann Bot* **120**: 195–207.
- 984 Vicient CM, Jääskeläinen MJ, Kalendar R, Schulman AH. 2001. Active Retrotransposons Are a  
985 Common Feature of Grass Genomes. *Plant Physiol* **125**: 1283–92.
- 986 Wei L, Gu L, Song X, Cui X, Lu Z, Zhou M, Wang L, Hu F, Zhai J, Meyers BC, et al. 2014. Dicer-like  
987 3 produces transposable element-associated 24-nt siRNAs that control agricultural traits in  
988 rice. *Proc Natl Acad Sci* **111**: 3877–82.
- 989 Woodhouse MR, Cheng F, Pires JC, Lisch D, Freeling M, Wang X. 2014. Origin, inheritance, and  
990 gene regulatory consequences of genome dominance in polyploids. *Proc Natl Acad Sci* **111**:  
991 5283–8.
- 992 Xia J, Zeng C, Chen Z, Zhang K, Chen X, Zhou Y, Song S, Lu C, Yang R, Yang Z, et al. 2014.  
993 Endogenous small-noncoding RNAs and their roles in chilling response and stress  
994 acclimation in Cassava. *BMC Genomics* **15**: 634.
- 995 Xia R, Chen C, Pokhrel S, Ma W, Huang K, Patel P, Wang F, Xu J, Liu Z, Li J, et al. 2019. 24-nt  
996 reproductive phasiRNAs are broadly present in angiosperms. *Nat Commun* **10**: 627.
- 997 Xia R, Xu J, Arikrit S, Meyers BC. 2015a. Extensive families of miRNAs and PHAS loci in Norway  
998 spruce demonstrate the origins of complex phasiRNA networks in seed plants. *Mol Biol*  
999 *Evol* **32**: 2905–18.
- 1000 Xia R, Ye S, Liu Z, Meyers BC, Liu Z. 2015b. Novel and Recently Evolved MicroRNA Clusters  
1001 Regulate Expansive F-BOX Gene Networks through Phased Small Interfering RNAs in Wild  
1002 Diploid Strawberry. *Plant Physiol* **169**: 594–610.
- 1003 Xie Z, Kasschau KD, Carrington JC. 2003. Negative feedback regulation of Dicer-Like1 in  
1004 Arabidopsis by microRNA-guided mRNA degradation. *Curr Biol* **13**: 784–9.
- 1005 Xu C, Jiao C, Sun H, Cai X, Wang X, Ge C, Zheng Y, Liu W, Sun X, Xu Y, et al. 2017. Draft genome  
1006 of spinach and transcriptome diversity of 120 Spinacia accessions. *Nat Commun* **8**: 15275.
- 1007 Yang L, Huang H. 2014. Roles of small RNAs in plant disease resistance. *J Integr Plant Biol* **56**:  
1008 962–70.
- 1009 Zhai J, Jeong DH, de Paoli E, Park S, Rosen BD, Li Y, González AJ, Yan Z, Kitto SL, Grusak MA, et  
1010 al. 2011. MicroRNAs as master regulators of the plant NB-LRR defense gene family via the  
1011 production of phased, trans-acting siRNAs. *Genes Dev* **25**: 2540–53.
- 1012 Zhai J, Zhang H, Arikrit S, Huang K, Nan GL, Walbot V, Meyers BC. 2015. Spatiotemporally  
1013 dynamic, cell-type-dependent premeiotic and meiotic phasiRNAs in maize anthers. *Proc*  
1014 *Natl Acad Sci U S A* **112**: 3146–51.
- 1015 Zhai L, Sun W, Zhang K, Jia H, Liu L, Liu Z, Teng F, Zhang Z. 2014. Identification and  
1016 characterization of Argonaute gene family and meiosis-enriched Argonaute during  
1017 sporogenesis in maize. *J Integr Plant Biol* **56**: 1042–52.
- 1018 Zhang, Zhang, Hao, Song, Li, Li, Gao, Zheng, Li. 2019. Lineage-Specific Evolved MicroRNAs  
1019 Regulating NB-LRR Defense Genes in Triticeae. *Int J Mol Sci* **20**: E3128.
- 1020 Zhao Y, Yu Y, Zhai J, Ramachandran V, Dinh TT, Meyers BC, Mo B, Chen X. 2012. The arabidopsis  
1021 nucleotidyl transferase HESO1 uridylates unmethylated small RNAs to trigger their  
1022 degradation. *Curr Biol* **22**: 689–94.



- 1023 Zheng Q, Rowley MJ, Böhmendorfer G, Sandhu D, Gregory BD, Wierzbicki AT. 2013. RNA  
1024 polymerase v targets transcriptional silencing components to promoters of protein-coding  
1025 genes. *Plant J* **73**: 179–89.
- 1026 Zheng Y, Wang Y, Wu J, Ding B, Fei Z. 2015. A dynamic evolutionary and functional landscape of  
1027 plant phased small interfering RNAs. *BMC Biol* **13**: 32.
- 1028 Zhong X, Hale CJ, Law JA, Johnson LM, Feng S, Tu A, Jacobsen SE. 2012. DDR complex facilitates  
1029 global association of RNA polymerase v to promoters and evolutionarily young  
1030 transposons. *Nat Struct Mol Biol* **19**: 870–5.

1031

1032

### 1033 **Supplemental Tables**

1034

1035 Supplemental Table S1. sRNA-seq libraries that were used as components in reference sets.  
1036 Format: comma-separated values (csv).

1037

1038 Supplemental Table S2. Small RNA-producing loci from 48 plant genomes. Gzip-compressed,  
1039 tab-separated text file. Note that the project website  
1040 (<http://plantsmallrnagenes.science.psu.edu>) has the same data with search functions, more  
1041 details, and alternative formats.

1042

1043 Supplemental Table S3. List of genes containing siRNA21 and siRNA22 loci in the nine monocot  
1044 species studied.

1045

1046 Supplemental Table S4. Grouping of small RNA loci into putative families based on sequences of  
1047 most abundant sRNA sequence. Gzip-compressed, tab-delimited text file.

1048

### 1049 **Supplemental Figures**

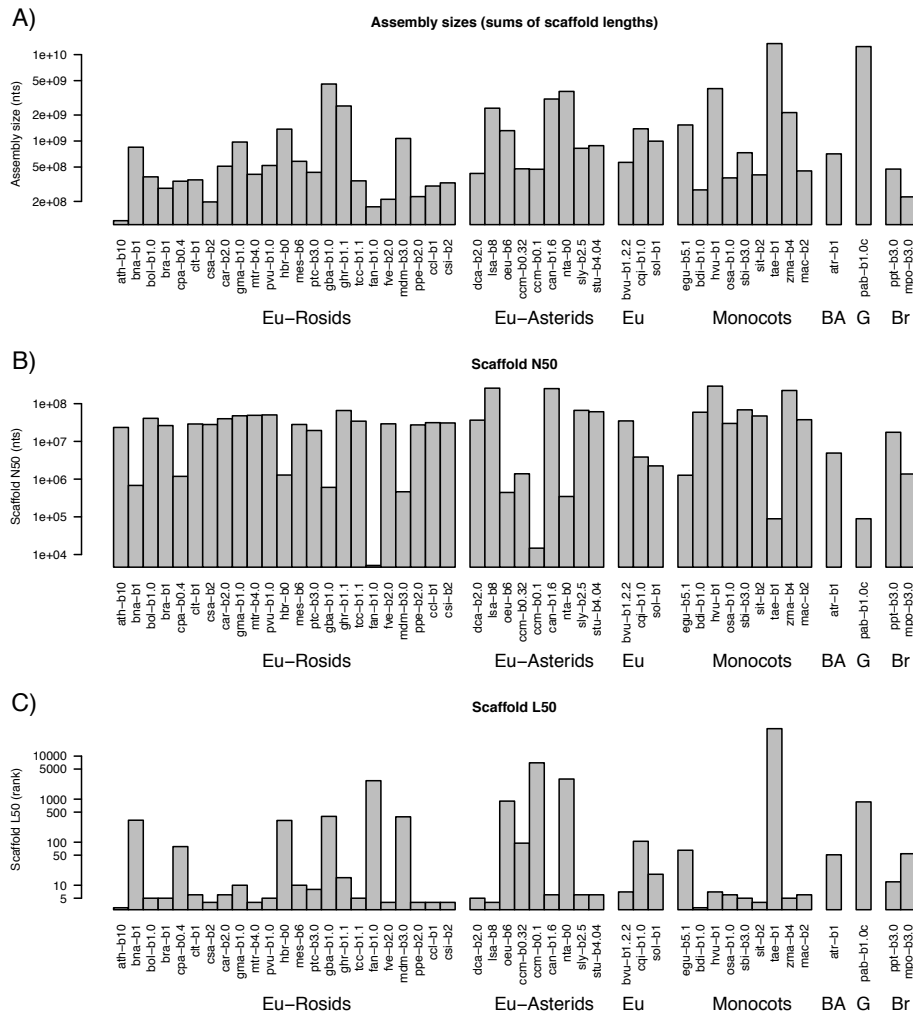

1050  
1051  
1052  
1053  
1054  
1055  
1056  
1057  
1058

**Supplemental Fig. S1.** Properties of genome assemblies used in this study. See Table 1 for species codes. Eu: eudicots, BA: basal angiosperm, G: gymnosperm, Br: bryophyte. **(A)** Genome assembly sizes (log<sub>10</sub> scale, nucleotides). **(B)** Scaffold N50 lengths (log<sub>10</sub> scale, nucleotides). **(C)** Scaffold L50 ranks (log<sub>10</sub> scale).

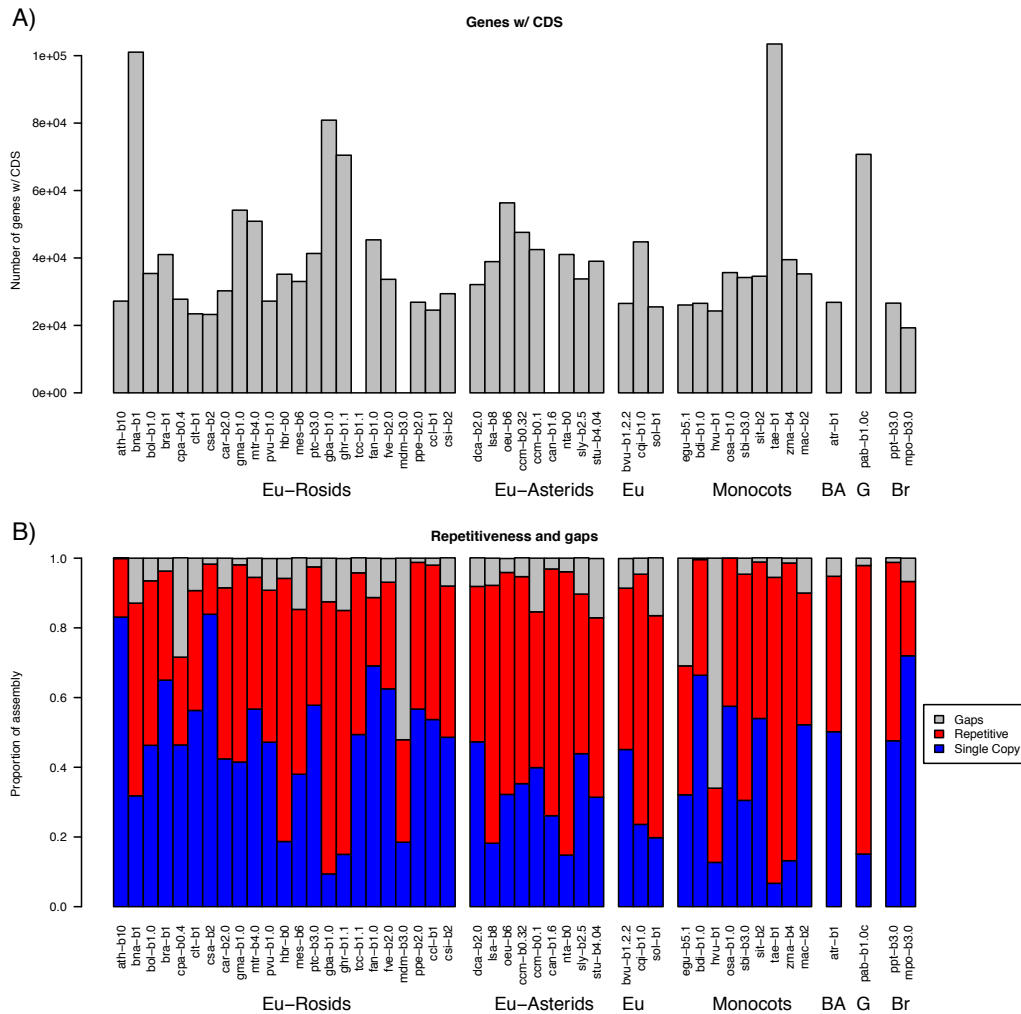

1059  
1060  
1061  
1062  
1063  
1064  
1065  
1066  
1067  
1068  
1069

**Supplemental Fig. S2.** Properties of gene annotations and genome assemblies used in this study. See Table 1 for species codes. Eu: eudicots, BA: basal angiosperm, G: gymnosperm, Br: bryophyte. **(A)** Counts of annotated genes that contain one or more CDS features. Note: data were unavailable for three assemblies (tcc-b1, mdm-b3.0, can-b1.6). **(B)** Repetitiveness, gaps, and single-copy regions, defined by k-mer analysis of genome assemblies with k=24. K-mers containing one or more ambiguous character were tallied as gaps. Non-ambiguous k-mers present more than once in the assembly were tallied as repetitive.

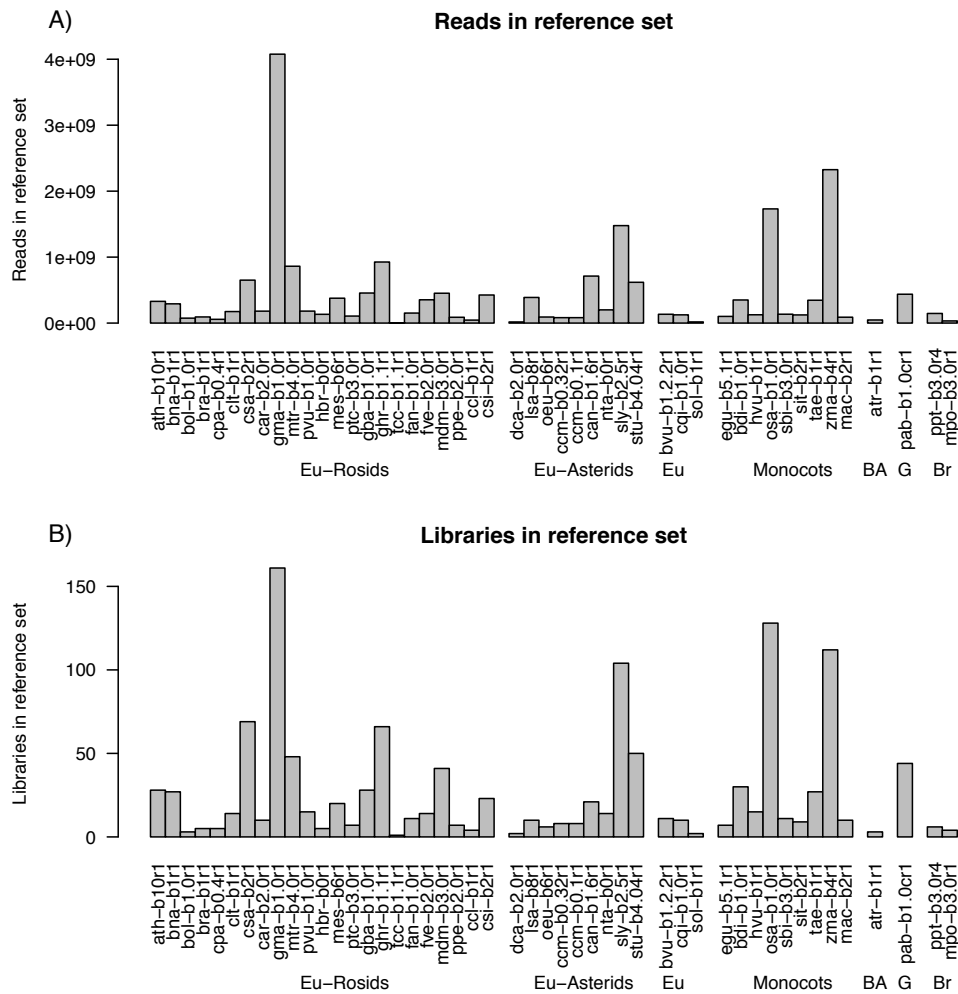

1070  
1071  
1072  
1073  
1074  
1075  
1076  
1077  
1078

**Supplemental Fig. S3.** Summary of sRNA-seq libraries and reference sets. See Table 1 for species codes. Eu: eudicots, BA: basal angiosperm, G: gymnosperm, Br: bryophyte. **(A)** Total number of sRNA-seq reads in reference sets. **(B)** Number of individual sRNA-libraries in reference sets.

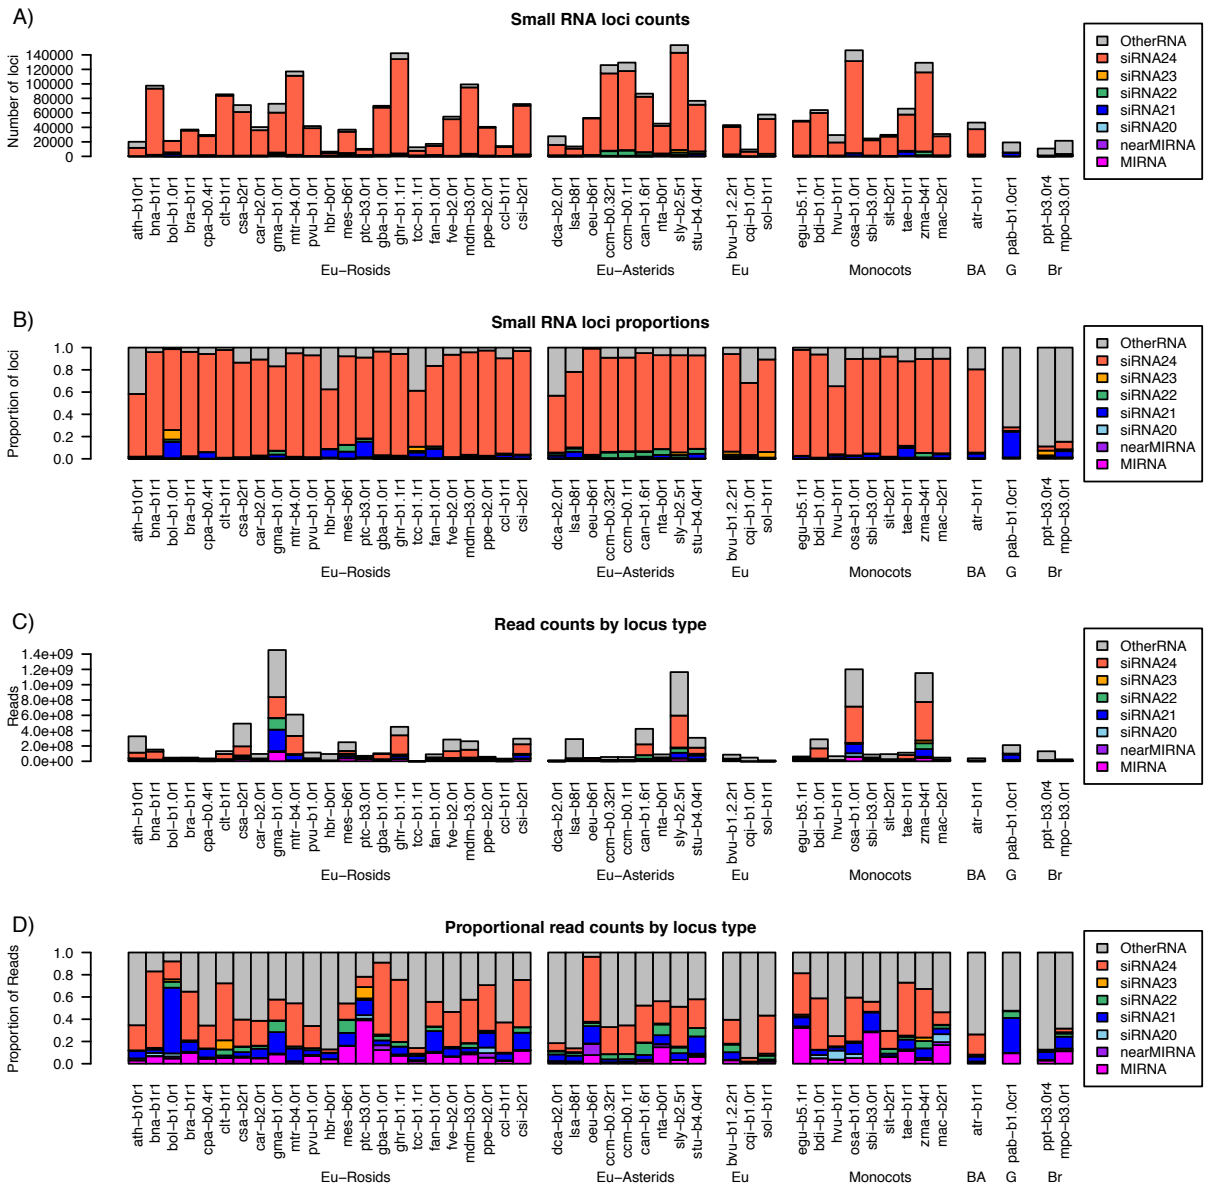

1079  
1080  
1081  
1082  
1083  
1084  
1085  
1086  
1087  
1088  
1089

**Supplemental Fig. S4.** Summary of annotated sRNA loci, by species and locus type, including the category 'OtherRNA'. See Table 1 for species codes. Eu: eudicots, BA: basal angiosperm, G: gymnosperm, Br: bryophyte. **(A)** Counts of annotated loci. **(B)** Proportions of annotated loci. **(C)** Total counts of aligned small RNAs in reference sets. **(D)** Proportions of small RNA total read counts in reference sets.

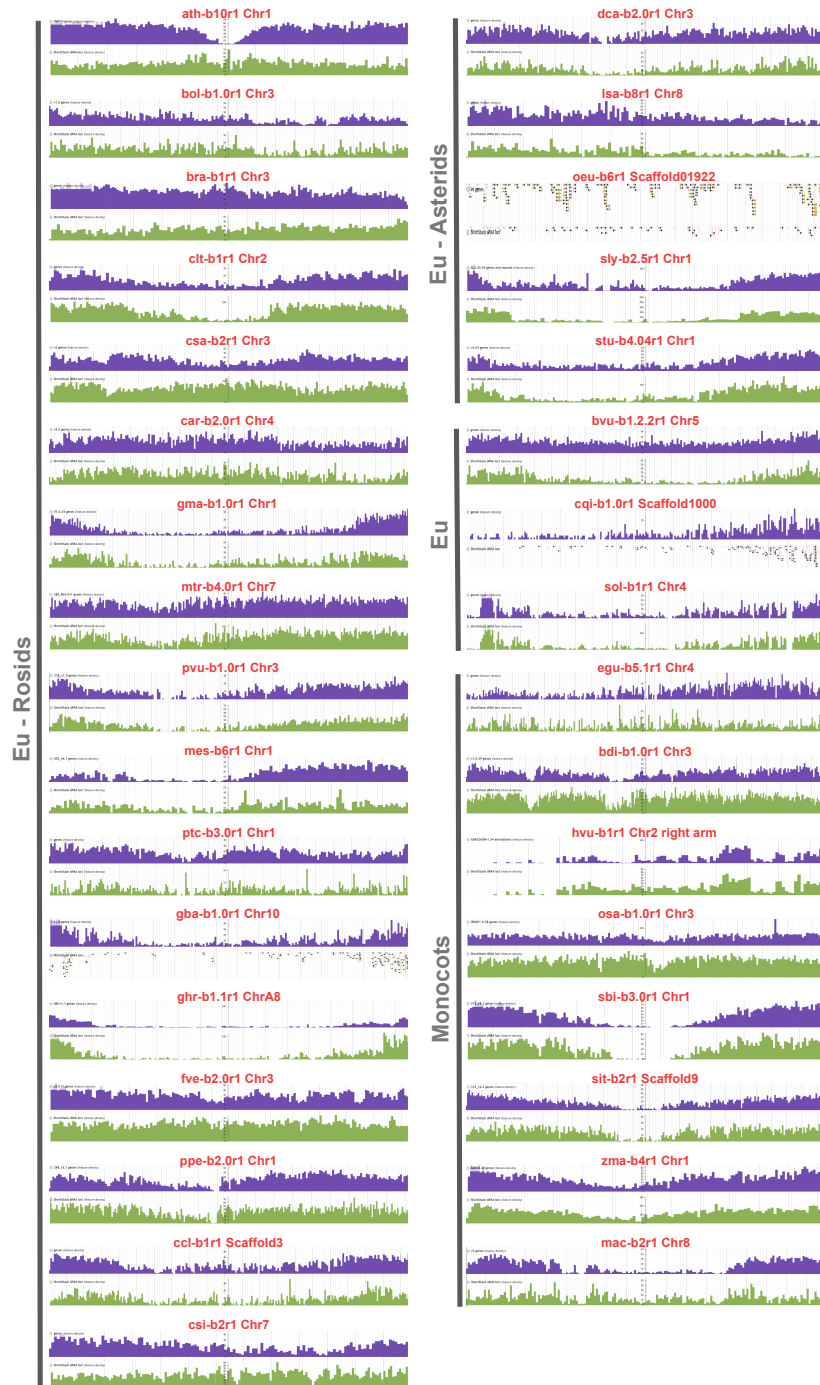

1090

1091

1092 **Supplemental Fig. S5.** Chromosomal distribution of genes and sRNA loci.

1093 Species with a number of annotated sRNA loci high enough to have a continuous chromosomal

1094 distribution are shown, instead, species with a low number of annotated sRNA loci that are

1095 scattered across the chromosomes are not shown. For each species one representative

1096 chromosome is shown. Purple: distribution of genes. Green: distribution of sRNA loci, including

1097 the category 'OtherRNA', which represents a minor contribution on the total loci for the species

1098 reported here. See Table 1 for species codes. Eu: eudicots.

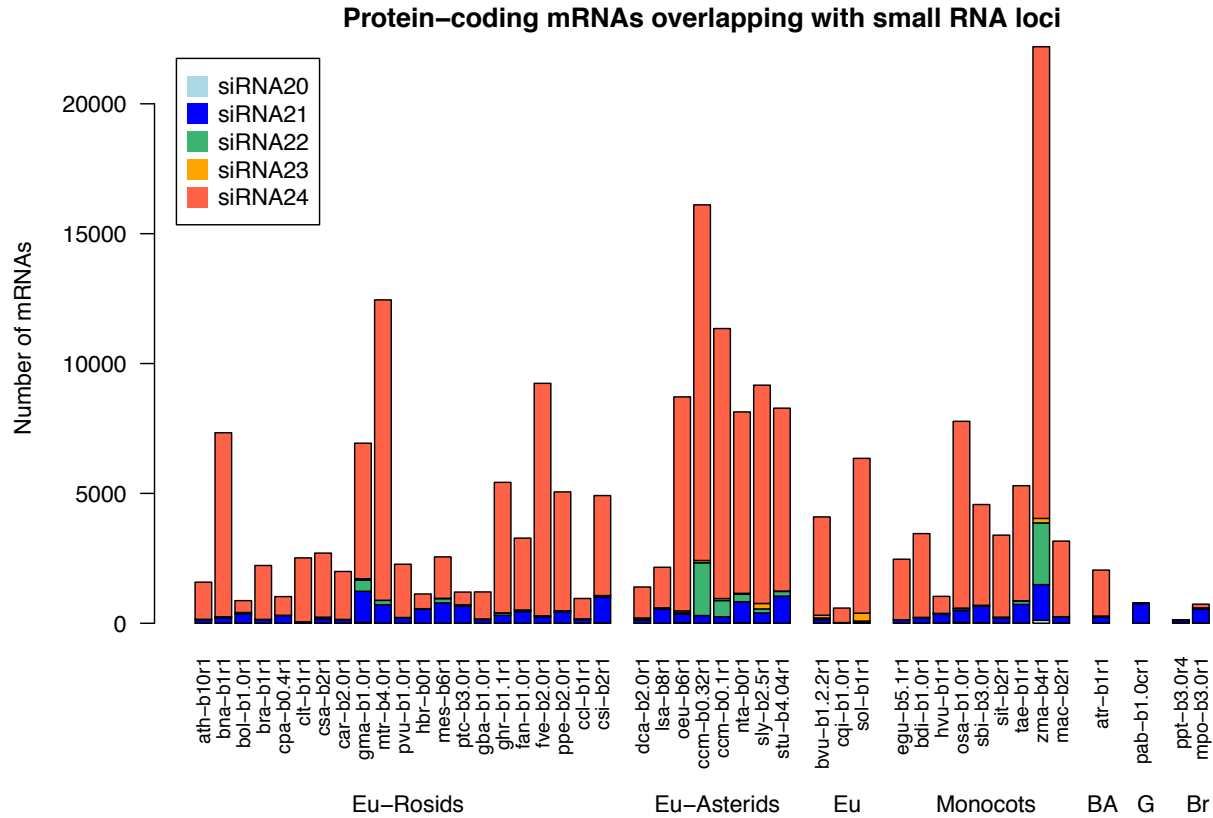

1099  
1100

1101 **Supplemental Fig. S6.** Number of protein-coding mRNAs that overlap with sRNA loci.  
 1102 Counts of mRNAs, containing at least one intron, that overlap with a sRNA locus for at least 25%  
 1103 of the length of the sRNA locus. In case of overlapping with multiple sRNA loci of different  
 1104 categories, the mRNA intersection was classified based on the longest overlapping sRNA locus.  
 1105 See Table 1 for species codes. Eu: eudicots, BA: basal angiosperm, G: gymnosperm, Br:  
 1106 bryophyte.
